# Supplementary material for: Grignard reagents as simple precatalysts for the dehydrocoupling of amines and silanes
Source: Royal Society of Chemistry journal article supplement (doi:10.1039/d4dt02403f), 2024-01-01
Supplement: d4dt02403f1.pdf [file d4dt02403f1.pdf]

Supporting Information for:

**Grignard Reagents as Simple Precatalysts for the Dehydrocoupling of Amine and Silanes**

Claire E. Bushey, Diego R. Javier-Jiménez, Matthew B. Reuter, Rory Waterman\*

Department of Chemistry, University of Vermont, Burlington, VT 05405-0125

\*E-mail: [rory.waterman@uvm.edu](mailto:rory.waterman@uvm.edu)

|                                                                               |    |
|-------------------------------------------------------------------------------|----|
| S1. General Methods .....                                                     | 3  |
| S2. Catalytic Experiments .....                                               | 3  |
| S2.1. General Procedure for Catalytic Experiments: .....                      | 3  |
| S2.2. PhSiH <sub>3</sub> and nBuNH <sub>2</sub> .....                         | 4  |
| S2.3. PhSiH <sub>3</sub> and tBuNH <sub>2</sub> .....                         | 6  |
| S2.4. PhSiH <sub>3</sub> and sBuNH <sub>2</sub> .....                         | 8  |
| S2.5. PhSiH <sub>3</sub> and nHeNH <sub>2</sub> .....                         | 10 |
| S2.6. PhSiH <sub>3</sub> and iPrNH <sub>2</sub> .....                         | 12 |
| S2.7. PhSiH <sub>3</sub> and Et <sub>2</sub> NH .....                         | 14 |
| S2.8. PhSiH <sub>3</sub> and PyNH .....                                       | 16 |
| S2.9. PhSiH <sub>3</sub> and PhNH <sub>2</sub> .....                          | 18 |
| S2.10. Ph <sub>2</sub> SiH <sub>2</sub> and nBuNH <sub>2</sub> .....          | 20 |
| S2.11. Ph <sub>2</sub> SiH <sub>2</sub> and tBuNH <sub>2</sub> .....          | 22 |
| S2.12. Ph <sub>2</sub> SiH <sub>2</sub> and PyNH .....                        | 24 |
| S2.13. Ph <sub>2</sub> SiH <sub>2</sub> and Et <sub>2</sub> NH .....          | 26 |
| S2.14. PhMeSiH <sub>2</sub> and nBuNH <sub>2</sub> .....                      | 28 |
| S2.15. PhMeSiH <sub>2</sub> and tBuNH <sub>2</sub> .....                      | 30 |
| S2.16. PhMeSiH <sub>2</sub> and PyNH .....                                    | 32 |
| S2.17. PhMeSiH <sub>2</sub> and Et <sub>2</sub> NH .....                      | 34 |
| S2.18. Ph <sub>3</sub> SiH and tBuNH <sub>2</sub> .....                       | 36 |
| S2.19. Ph <sub>3</sub> SiH and nBuNH <sub>2</sub> .....                       | 38 |
| S2.20. Ph <sub>3</sub> SiH and PyNH .....                                     | 40 |
| S3. Mechanistic Investigations .....                                          | 43 |
| S3.1. Stoichiometric PhSiH <sub>3</sub> and MeMgBr .....                      | 43 |
| S3.2. Stoichiometric nBuNH <sub>2</sub> and MeMgBr .....                      | 44 |
| S3.3. PhSiH <sub>3</sub> and nBuNH <sub>2</sub> with MesMgBr .....            | 45 |
| S3.4. PhSiH <sub>3</sub> and nBuNH <sub>2</sub> with Me <sub>2</sub> Mg ..... | 47 |
| S4. References .....                                                          | 50 |

## S1. General Methods

All manipulations were conducted under a positive pressure of N<sub>2</sub> in a M. Braun glovebox or using standard Schlenk techniques. Dry, oxygen-free solvents, reagents, and solid support were used throughout experimentation and stored inside the glovebox. Benzene-*d*<sub>6</sub> (C<sub>6</sub>D<sub>6</sub>) was distilled from CaH<sub>2</sub> and stored over activated 3Å molecular sieves for at least 48 h prior to use. 3Å molecular sieves were dried between 180-200 °C under dynamic vacuum for at least 1 d.

Methyl magnesium bromide and 2-mesitylmagnesium bromide (MesMgBr) were obtained from chemical vendors as solutions in tetrahydrofuran (THF). Dimethylmagnesium was synthesized according to a modified literature procedure followed by filtration.<sup>1</sup> For catalysis, these reagents were titrated thrice with I<sub>2</sub> and 0.5 M LiCl in THF. Amines were distilled under dynamic N<sub>2</sub> from CaH<sub>2</sub> and stored over 3Å molecular sieves. PhSiH<sub>3</sub> was distilled under dynamic N<sub>2</sub> and stored over 3Å molecular sieves while Ph<sub>2</sub>SiH<sub>2</sub> and PhMeSiH<sub>2</sub> were distilled under dynamic vacuum and stored over 3Å molecular sieves. Ph<sub>3</sub>SiH was recrystallized from hexanes solution at -40 °C. Hexamethylbenzene (C<sub>6</sub>Me<sub>6</sub>) was sublimed at 150 °C under dynamic vacuum.

Glassware was cleaned by sequential washings of base (5% KOH/10% <sup>i</sup>PrOH/85% H<sub>2</sub>O), acid (10% HNO<sub>3</sub>/90% H<sub>2</sub>O), and deionized water. Glassware was oven dried at 140 °C for at least 1 h, which was either transferred to the antechamber of an M. Braun glovebox or placed under dynamic vacuum connected to a Schlenk line. Catalytic reactions were conducted in PTFE-sealed J-Young NMR tubes, which were cleaned and dried by the methods mentioned above.

Nuclear magnetic resonance (NMR) spectra were recorded at ambient temperature on a Bruker AXR 500 MHz spectrometer. Chemical shifts (δ) are reported in parts per million (ppm). <sup>1</sup>H NMR spectra were referenced to an internal standard of C<sub>6</sub>Me<sub>6</sub> (δ = 2.13).

## S2. Catalytic Experiments

### S2.1. General Procedure for Catalytic Experiments:

In an M. Braun glovebox, a 20 mL scintillation vial was charged with 0.5 mL of benzene-*d*<sub>6</sub>, followed by 50 μL 0.4 M C<sub>6</sub>Me<sub>6</sub> in benzene-*d*<sub>6</sub>, silane, amine, and catalyst. The solution was quickly transferred to a PTFE-sealed J-Young NMR tube via a glass pipette and left to react at ambient temperature unless otherwise specified.

| Icon                                                                              | Meaning                        |
|-----------------------------------------------------------------------------------|--------------------------------|
|  | Aminosilane                    |
|  | Silane                         |
|  | Hydrogen Gas                   |
|  | C <sub>6</sub> Me <sub>6</sub> |
|  | Methane                        |

**Figure S.1.** List of icons and identifiers

### S2.2. PhSiH<sub>3</sub> and <sup>n</sup>BuNH<sub>2</sub>

PhSiH<sub>3</sub> (41.0 μL, 3.36 × 10<sup>-1</sup> mmol), <sup>n</sup>BuNH<sub>2</sub> (201.0 μL, 20.16 × 10<sup>-1</sup> mmol, 6.0 equiv.), and MeMgBr (15.0 μL, 1.68 × 10<sup>-2</sup> mmol, 5.0 mol %) were reacted together in 0.5 mL of benzene-*d*<sub>6</sub> in the presence of C<sub>6</sub>Me<sub>6</sub> standard (50.0 μL, 0.4 M in benzene-*d*<sub>6</sub>). Complete consumption of PhSiH<sub>3</sub> was observed after 0.5 h. The appearance of multiplet centered at δ = 2.87 in the <sup>1</sup>H NMR spectrum indicates 98% conversion to PhSi(NH<sup>n</sup>Bu)<sub>3</sub> after 0.5 h at ambient temperature.

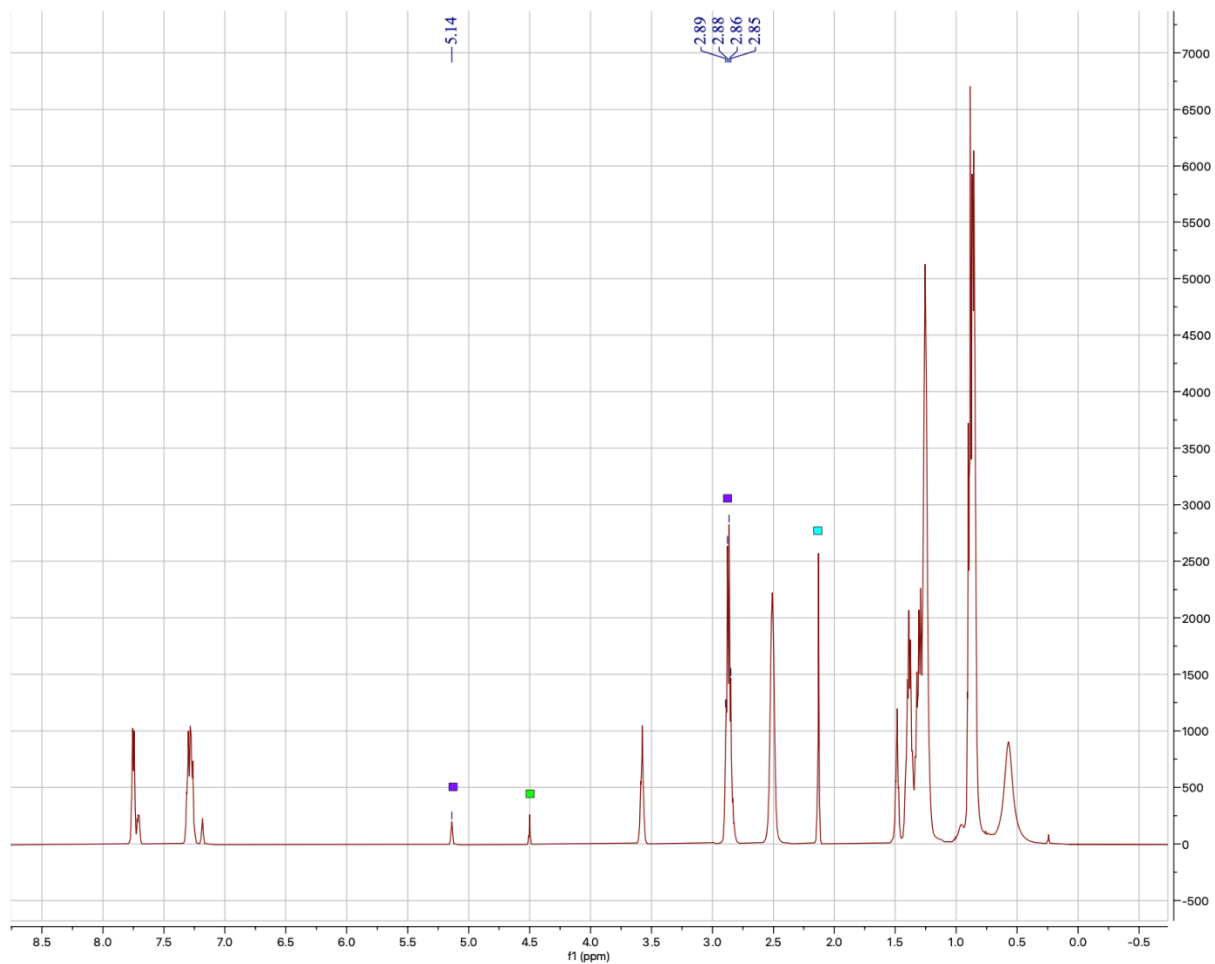

**Figure S.2.**  $^1\text{H}$  NMR spectrum of the reaction between  $\text{PhSiH}_3$  and  $t\text{BuNH}_2$  catalyzed by  $\text{MeMgBr}$  in benzene- $d_6$  after 0.5 h.

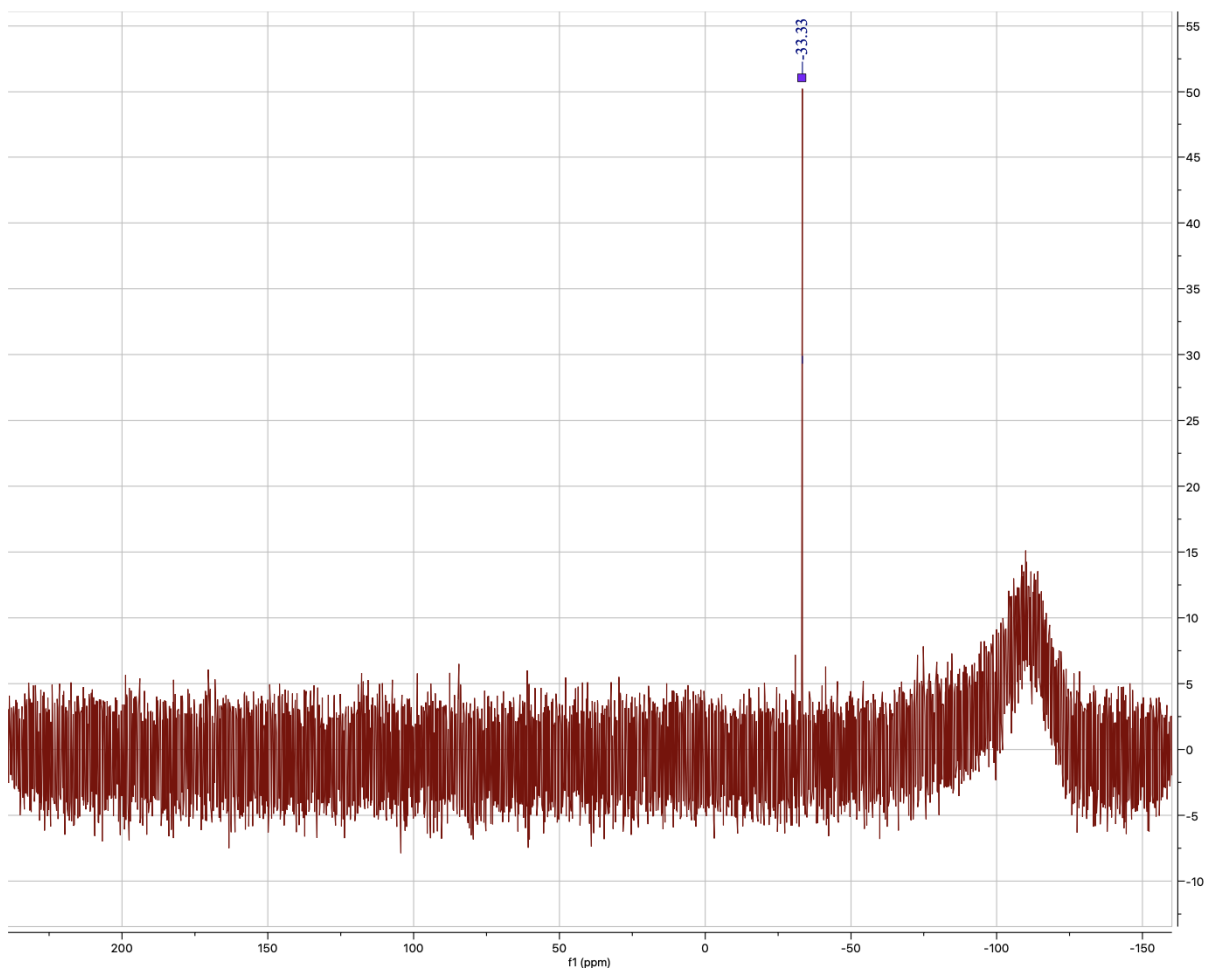

**Figure S.3.**  $^{29}\text{Si}\{^1\text{H}\}$  NMR spectrum of the reaction between  $\text{PhSiH}_3$  and  $^t\text{BuNH}_2$  catalyzed by  $\text{MeMgBr}$  in benzene- $d_6$  after 0.5 h.

### S2.3. $\text{PhSiH}_3$ and $^t\text{BuNH}_2$

$\text{PhSiH}_3$  (41.0  $\mu\text{L}$ ,  $3.36 \times 10^{-1}$  mmol),  $^t\text{BuNH}_2$  (212.0  $\mu\text{L}$ ,  $20.16 \times 10^{-1}$  mmol, 6.0 equiv.), and  $\text{MeMgBr}$  (15.0  $\mu\text{L}$ ,  $1.68 \times 10^{-2}$  mmol, 5.0 mol %) were reacted together in 0.5 mL of benzene- $d_6$  in the presence of  $\text{C}_6\text{Me}_6$  standard (50.0  $\mu\text{L}$ , 0.4 M in benzene- $d_6$ ). The appearance of a diagnostic triplet centered at  $\delta = 5.42$  in the  $^1\text{H}$  NMR spectrum indicates 9% conversion to  $\text{PhSiH}(\text{NH}^t\text{Bu})_2$  after 1 h at ambient temperatures while the appearance of a diagnostic doublet centered between  $\delta = 5.06$  and  $\delta = 5.07$  in the  $^1\text{H}$  NMR spectrum indicates 91% conversion to  $\text{PhSiH}_2(\text{NH}^t\text{Bu})$  after 1 h at ambient temperatures. Spectra were consistent with previous reports of this compound.<sup>2,3</sup>

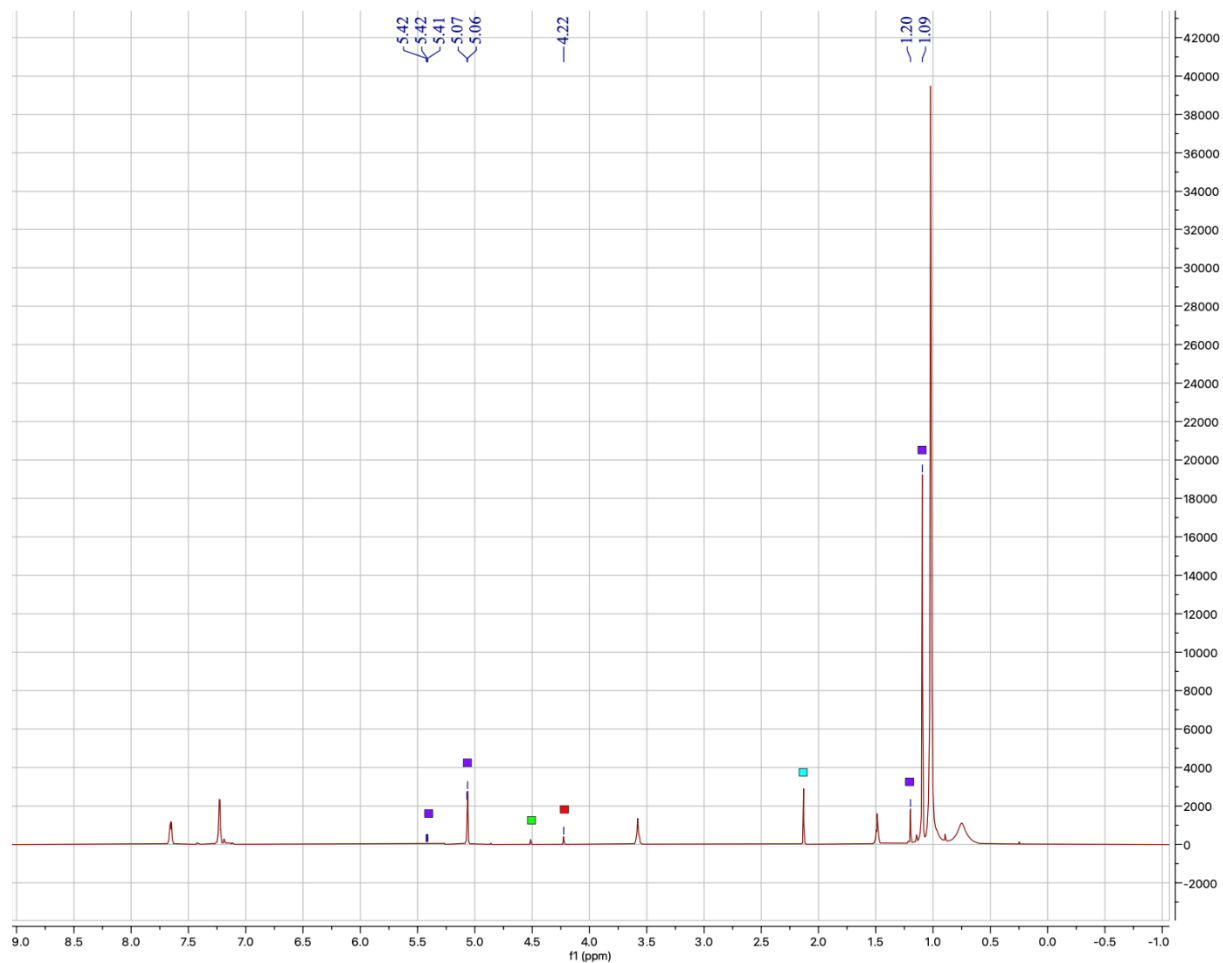

**Figure S.4.**  $^1\text{H}$  NMR spectrum of the reaction between  $\text{PhSiH}_3$  and  $t\text{BuNH}_2$  catalyzed by  $\text{MeMgBr}$  in benzene- $d_6$  after 1 h.

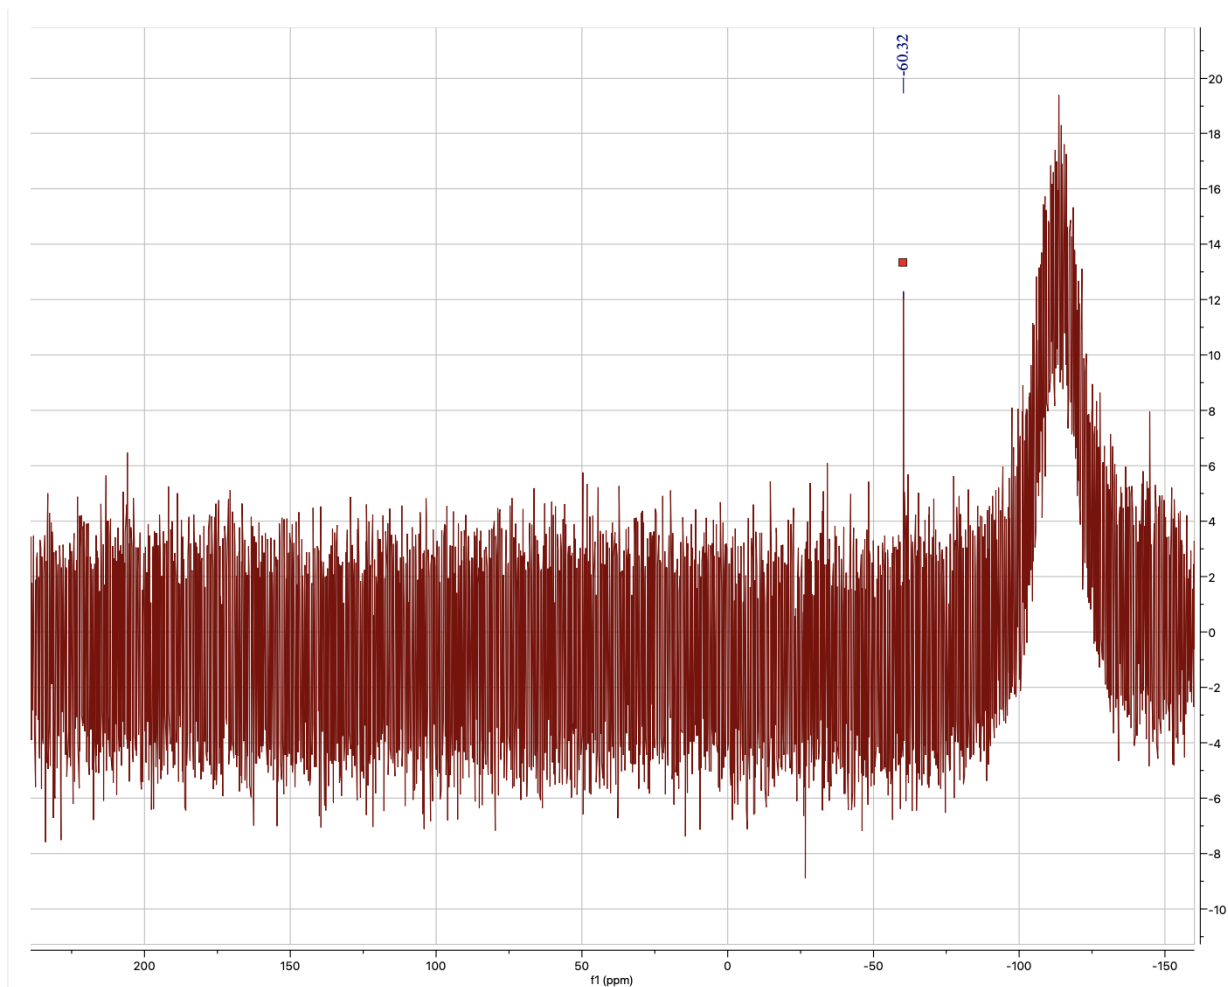

**Figure S.5.**  $^{29}\text{Si}\{^1\text{H}\}$  NMR spectrum of the reaction between  $\text{PhSiH}_3$  and  $^t\text{BuNH}_2$  catalyzed by  $\text{MeMgBr}$  in benzene- $d_6$  after 1 h.

#### S2.4. $\text{PhSiH}_3$ and $^t\text{BuNH}_2$

$\text{PhSiH}_3$  (41.0  $\mu\text{L}$ ,  $3.36 \times 10^{-1}$  mmol),  $^t\text{BuNH}_2$  (204.0  $\mu\text{L}$ ,  $20.16 \times 10^{-1}$  mmol, 6.0 equiv.), and  $\text{MeMgBr}$  (15.0  $\mu\text{L}$ ,  $1.68 \times 10^{-2}$  mmol, 5.0 mol %) were reacted together in 0.5 mL of benzene- $d_6$  in the presence of  $\text{C}_6\text{Me}_6$  standard (50.0  $\mu\text{L}$ , 0.4 M in benzene- $d_6$ ). Complete consumption of  $\text{PhSiH}_3$  was observed after 1 h. The appearance of a multiplet centered at  $\delta = 2.97$  and a multiplet centered at  $\delta = 5.20$  in the  $^1\text{H}$  NMR spectrum indicates 70% conversion to  $\text{PhSi}(\text{NH}^t\text{Bu})_3$  after 1 h at ambient temperature.



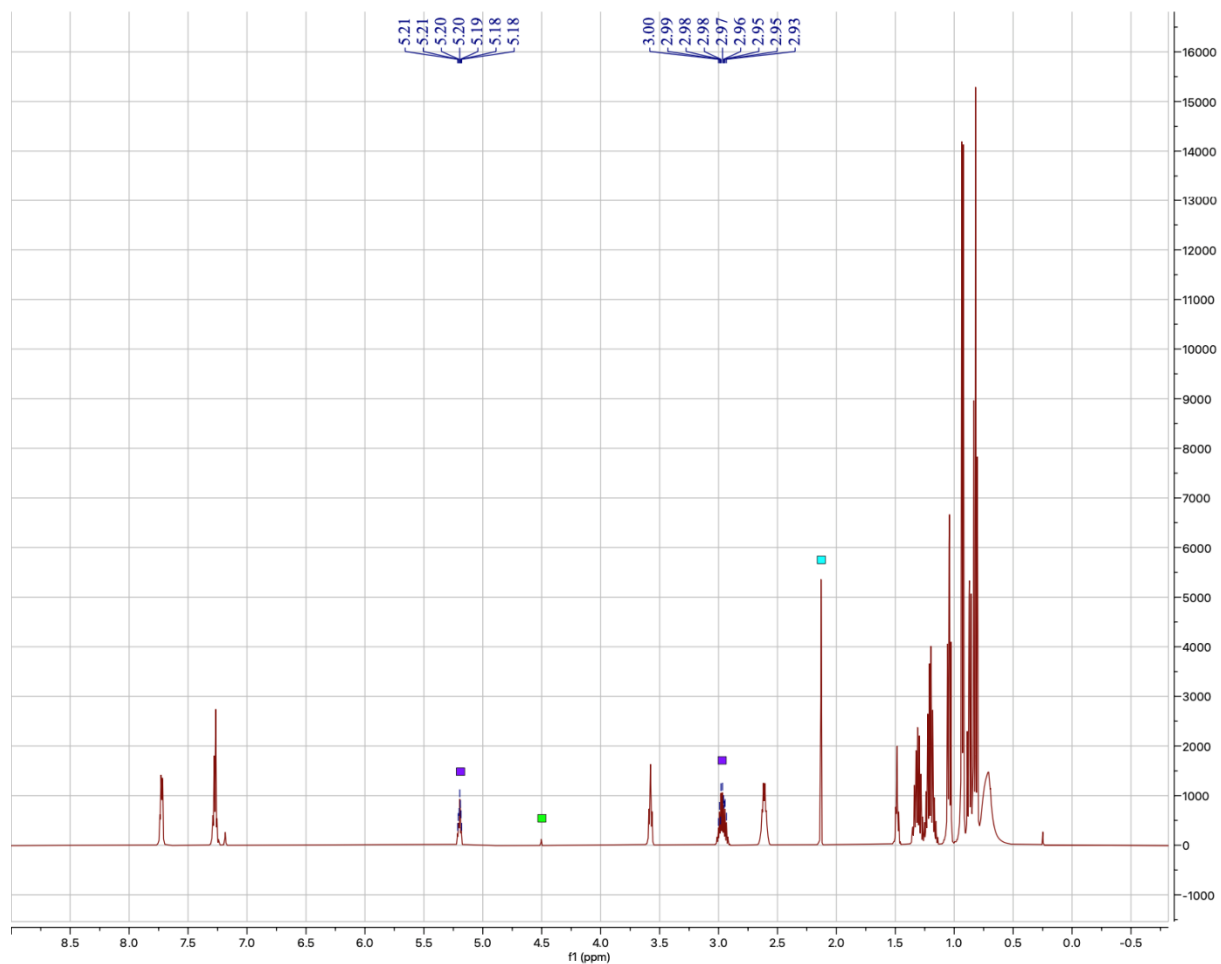

**Figure S.6.**  $^1\text{H}$  NMR spectrum of the reaction between  $\text{PhSiH}_3$  and  $^s\text{BuNH}_2$  catalyzed by  $\text{MeMgBr}$  in benzene- $d_6$  after 1 h.

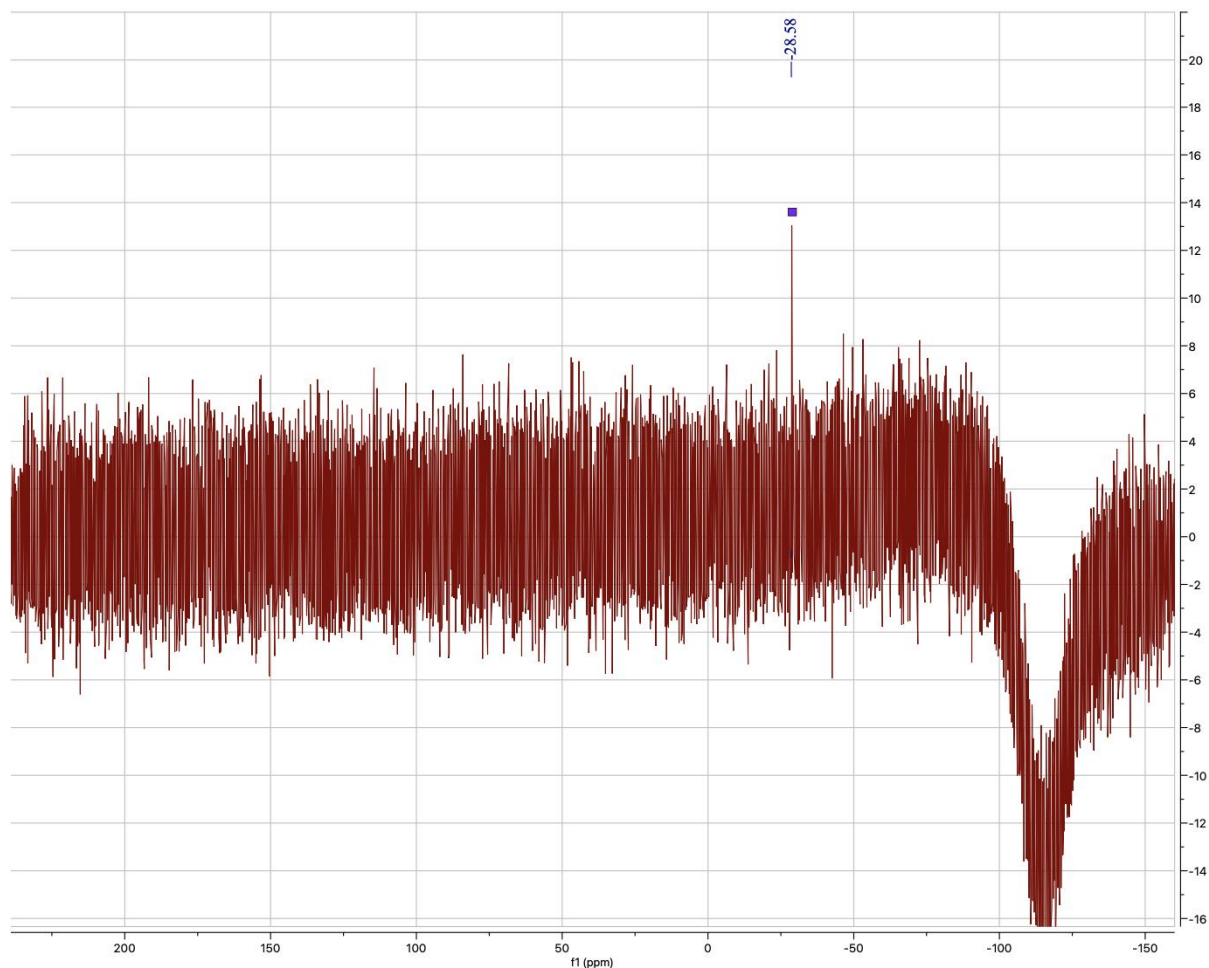

**Figure S.7.**  $^{29}\text{Si}\{^1\text{H}\}$  NMR spectrum of the reaction between  $\text{PhSiH}_3$  and  $^s\text{BuNH}_2$  catalyzed by  $\text{MeMgBr}$  in benzene- $d_6$  after 1 h.

### S2.5. $\text{PhSiH}_3$ and $^n\text{HeNH}_2$

$\text{PhSiH}_3$  (41.0  $\mu\text{L}$ ,  $3.36 \times 10^{-1}$  mmol),  $^n\text{HeNH}_2$  (266.0  $\mu\text{L}$ ,  $20.16 \times 10^{-1}$  mmol, 6.0 equiv.), and  $\text{MeMgBr}$  (15.0  $\mu\text{L}$ ,  $1.68 \times 10^{-2}$  mmol, 5.0 mol %) were reacted together in 0.5 mL of benzene- $d_6$  in the presence of  $\text{C}_6\text{Me}_6$  standard (50.0  $\mu\text{L}$ , 0.4 M in benzene- $d_6$ ). Complete consumption of  $\text{PhSiH}_3$  was observed after 1 h. The appearance of a multiplet centered at  $\delta = 2.88$  in the  $^1\text{H}$  NMR spectrum indicates 98% conversion to  $\text{PhSi}(\text{NH}^n\text{He})_3$  after 1 h at ambient temperature.

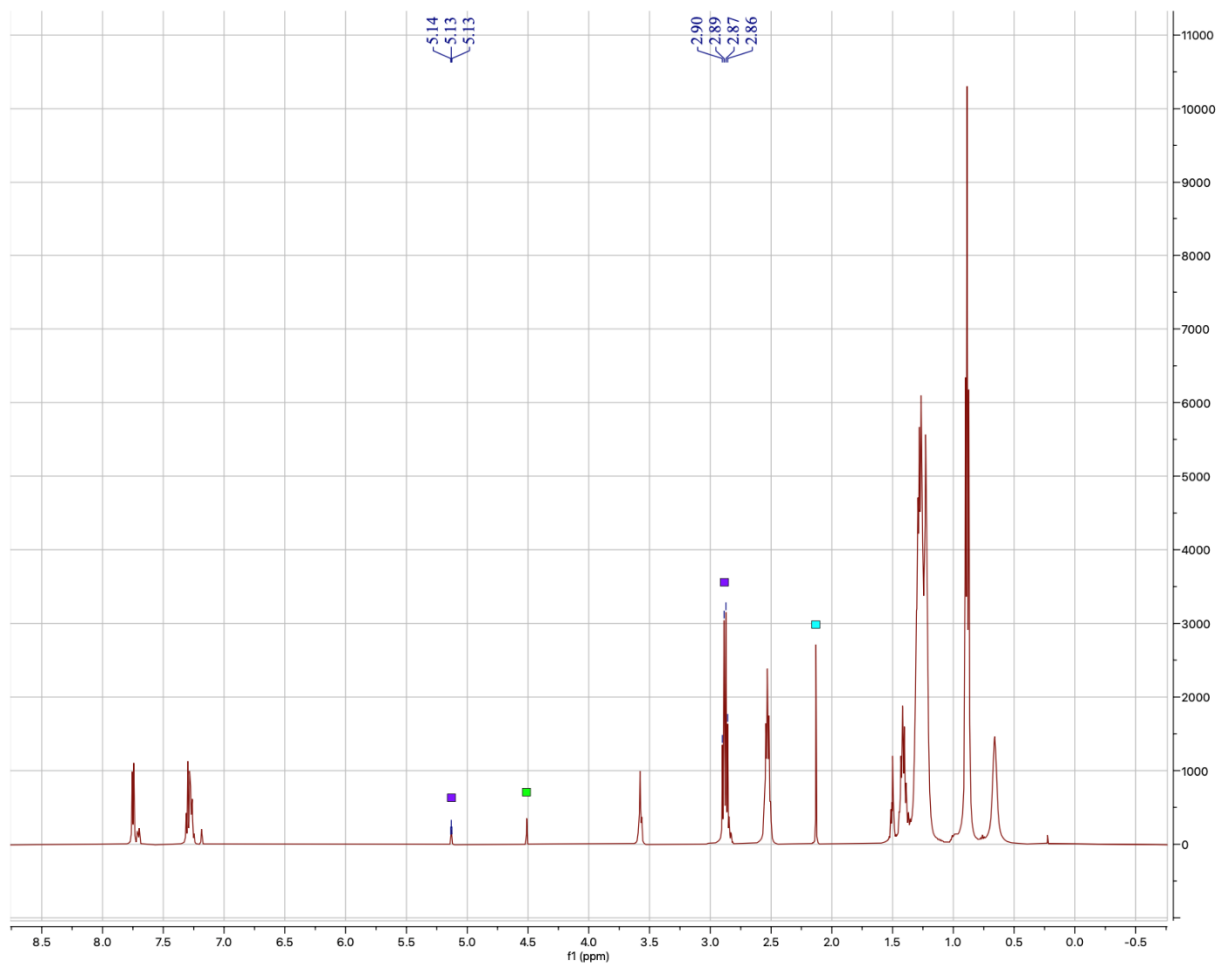

**Figure S.8.**  $^1\text{H}$  NMR spectrum of the reaction between  $\text{PhSiH}_3$  and  $^3\text{HeNH}_2$  catalyzed by  $\text{MeMgBr}$  in benzene- $d_6$  after 1 h.

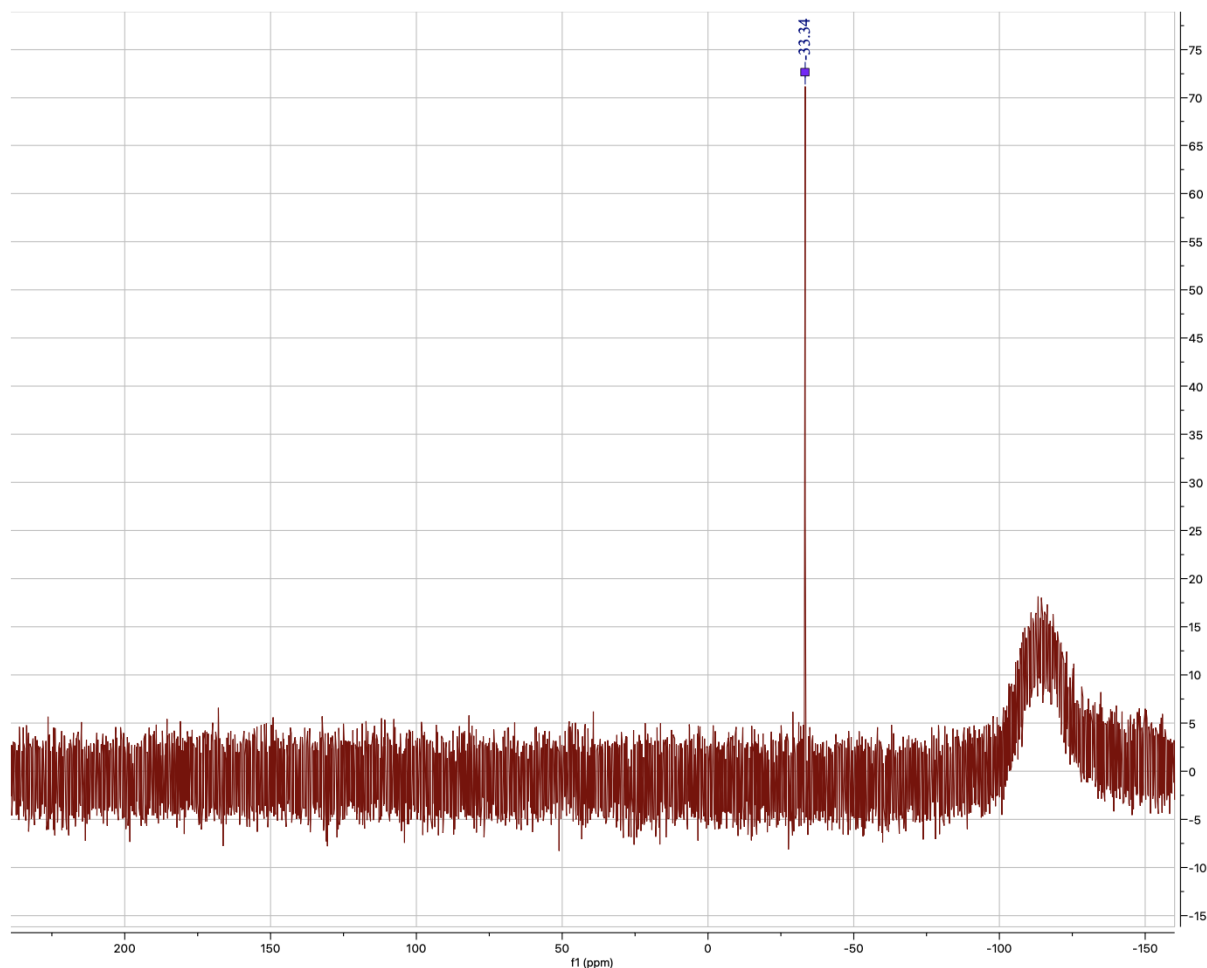

**Figure S.9.**  $^{29}\text{Si}\{^1\text{H}\}$  NMR spectrum of the reaction between  $\text{PhSiH}_3$  and  $n\text{HeNH}_2$  catalyzed by  $\text{MeMgBr}$  in benzene- $d_6$  after 1 h.

### S2.6. $\text{PhSiH}_3$ and $i\text{PrNH}_2$

$\text{PhSiH}_3$  (41.0  $\mu\text{L}$ ,  $3.36 \times 10^{-1}$  mmol),  $i\text{PrNH}_2$  (173.0  $\mu\text{L}$ ,  $20.16 \times 10^{-1}$  mmol, 6.0 equiv.), and  $\text{MeMgBr}$  (15.0  $\mu\text{L}$ ,  $1.68 \times 10^{-2}$  mmol, 5.0 mol %) were reacted together in 0.5 mL of benzene- $d_6$  in the presence of  $\text{C}_6\text{Me}_6$  standard (50.0  $\mu\text{L}$ , 0.4 M in benzene- $d_6$ ). Complete consumption of  $\text{PhSiH}_3$  was observed after 1 h. The appearance of a multiplet centered at  $\delta = 3.23$  in the  $^1\text{H}$  NMR spectrum indicates 70% conversion to  $\text{PhSi}(\text{NH}^i\text{Pr})_3$  after 1 h at ambient temperature. Spectra were consistent with previous reports of this compound.<sup>2,4</sup>

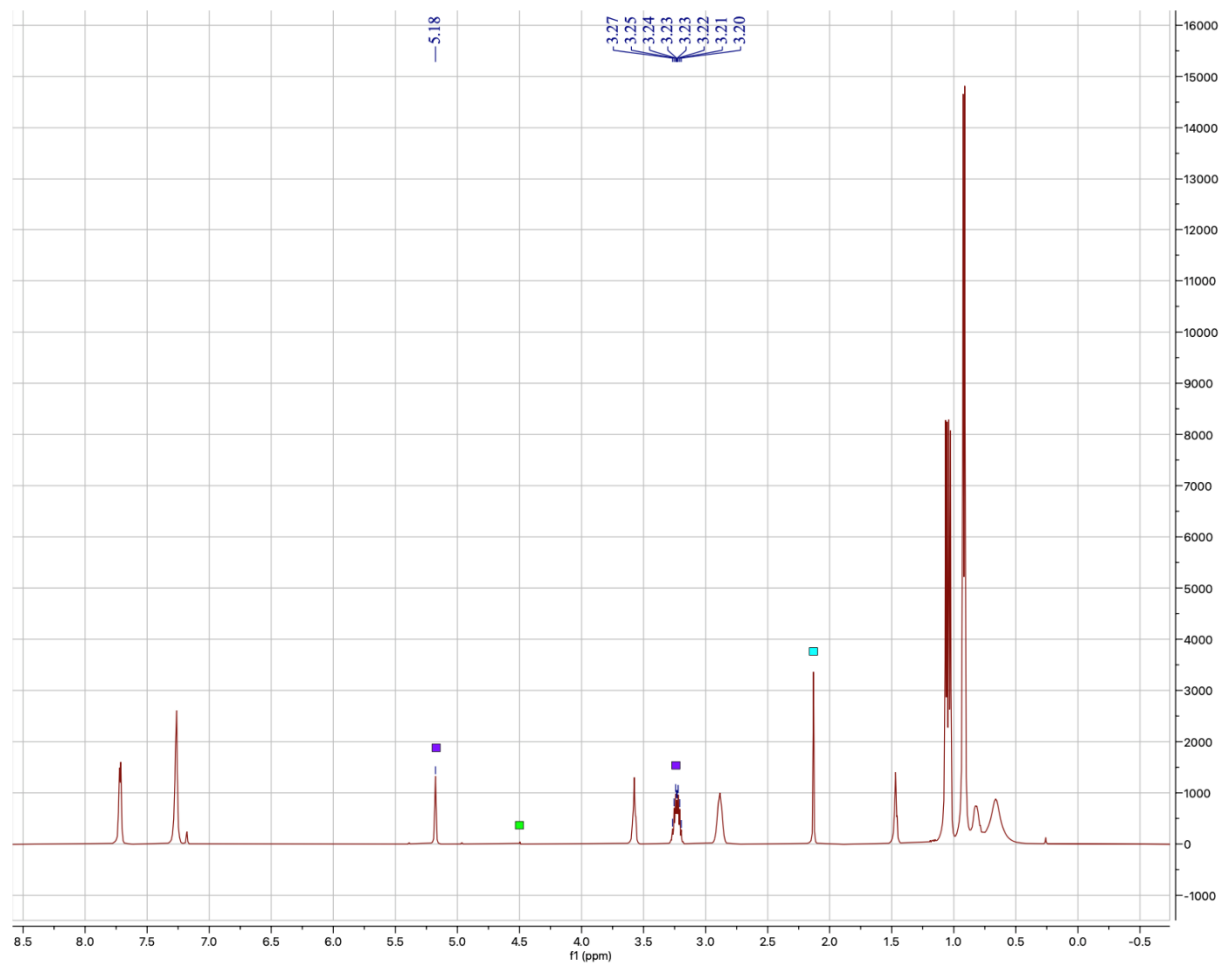

**Figure S.10.**  $^1\text{H}$  NMR spectrum of the reaction between  $\text{PhSiH}_3$  and  $i\text{PrNH}_2$  catalyzed by  $\text{MeMgBr}$  in benzene- $d_6$  after 1 h.

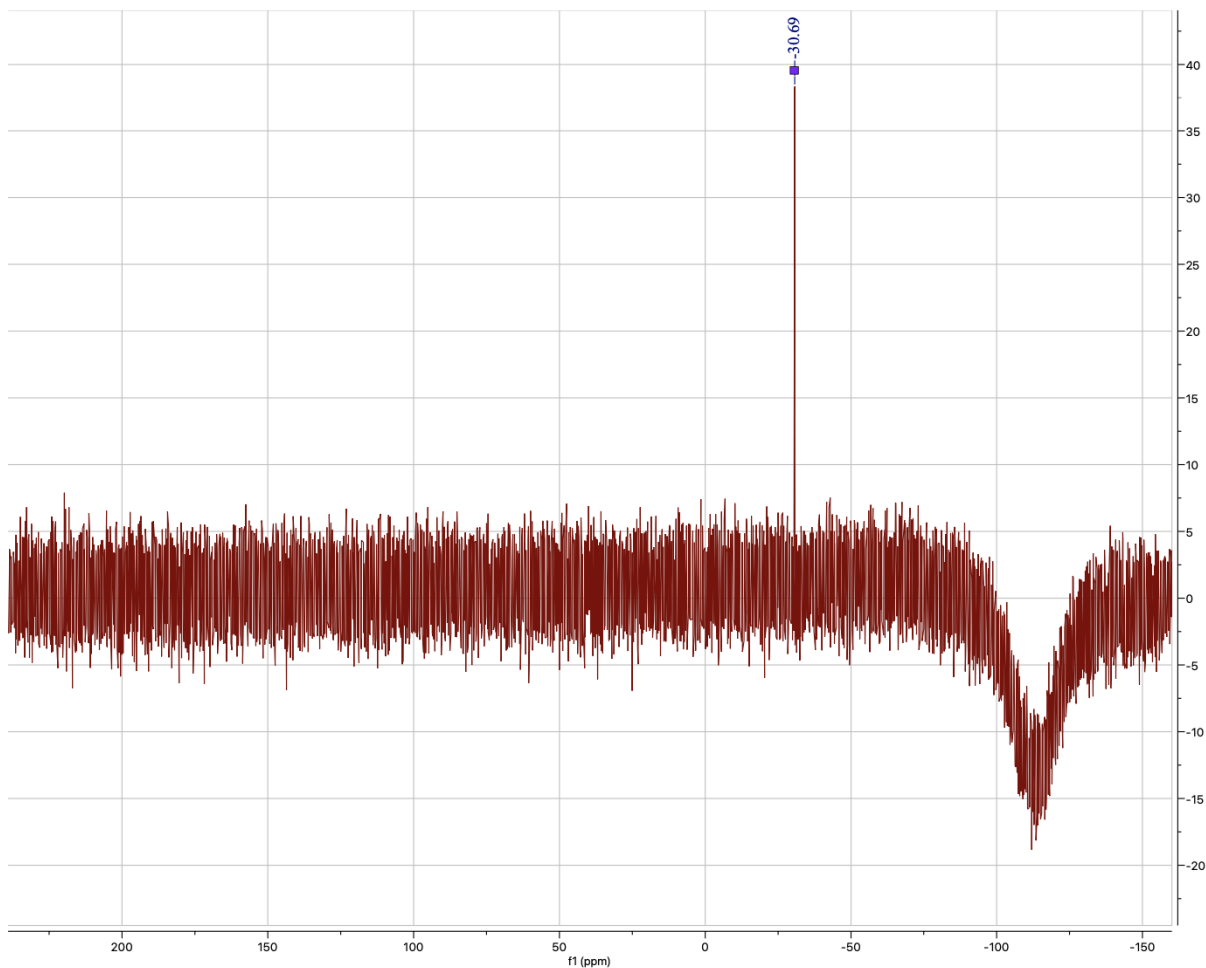

**Figure S.11.**  $^{29}\text{Si}\{^1\text{H}\}$  NMR spectrum of the reaction between  $\text{PhSiH}_3$  and  $i\text{PrNH}_2$  catalyzed by  $\text{MeMgBr}$  in benzene- $d_6$  after 1 h.

### S2.7. $\text{PhSiH}_3$ and $\text{Et}_2\text{NH}$

$\text{PhSiH}_3$  (41.0  $\mu\text{L}$ ,  $3.36 \times 10^{-1}$  mmol),  $\text{Et}_2\text{NH}$  (209.0  $\mu\text{L}$ ,  $20.16 \times 10^{-1}$  mmol, 6.0 equiv.), and  $\text{MeMgBr}$  (15.0  $\mu\text{L}$ ,  $1.68 \times 10^{-2}$  mmol, 5.0 mol %) were reacted together in 0.5 mL of benzene- $d_6$  in the presence of  $\text{C}_6\text{Me}_6$  standard (50.0  $\mu\text{L}$ , 0.4 M in benzene- $d_6$ ). Complete consumption of  $\text{PhSiH}_3$  was observed after 1 h. The appearance of two multiplets, one centered between  $\delta = 2.92$  and  $\delta = 2.93$  and the second centered between  $\delta = 2.83$  and  $\delta = 2.84$  in the  $^1\text{H}$  NMR spectrum, indicates 44% conversion to  $\text{PhSiH}(\text{NEt}_2)_2$  and 56% conversion to  $\text{PhSiH}_2(\text{NEt}_2)$  after 1 h at ambient temperature. Spectra were consistent with previous reports of this compound.<sup>2,5,6</sup>

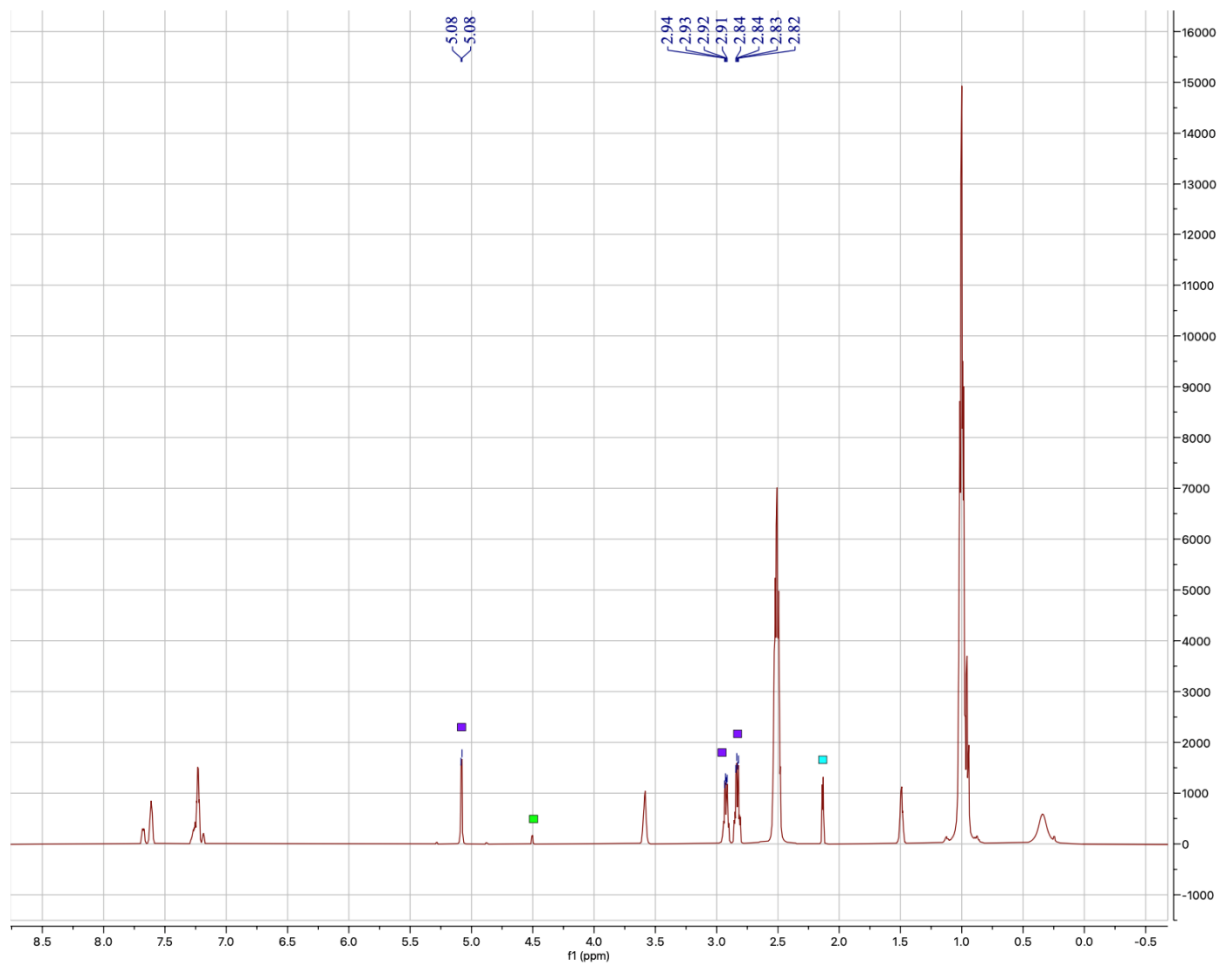

**Figure S.12.**  $^1\text{H}$  NMR spectrum of the reaction between  $\text{PhSiH}_3$  and  $\text{Et}_2\text{NH}$  catalyzed by  $\text{MeMgBr}$  in benzene- $d_6$  after 1 h.

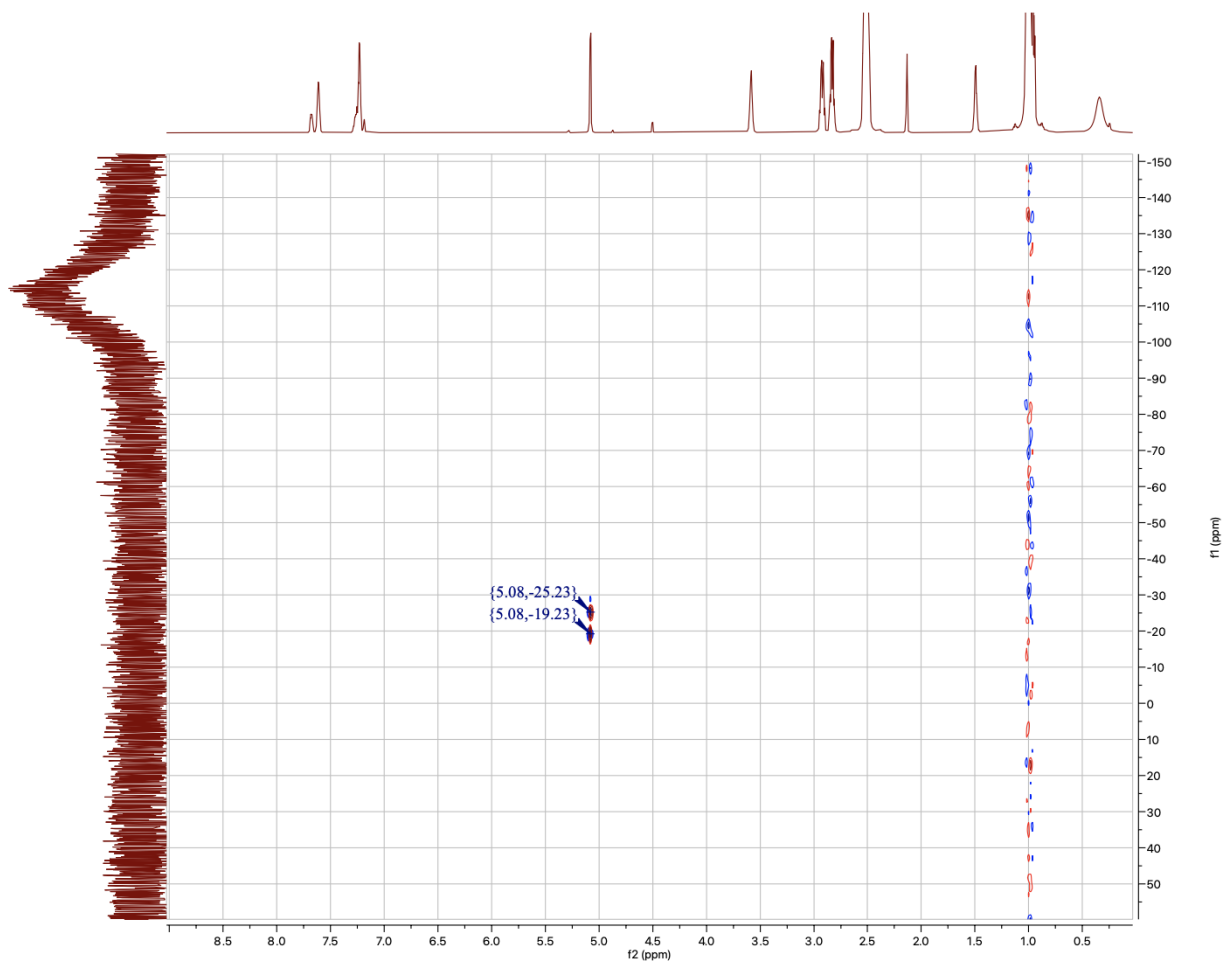

**Figure S.13.**  $^1\text{H}$ - $^{29}\text{Si}\{^1\text{H}\}$  HSQC NMR spectrum of the reaction between  $\text{PhSiH}_3$  and  $\text{Et}_2\text{NH}$  catalyzed by  $\text{MeMgBr}$  in benzene- $d_6$  after 1 h.

### S2.8. $\text{PhSiH}_3$ and $\text{PyNH}$

$\text{PhSiH}_3$  (41.0  $\mu\text{L}$ ,  $3.36 \times 10^{-1}$  mmol),  $\text{PyNH}$  (168.0  $\mu\text{L}$ ,  $20.16 \times 10^{-1}$  mmol, 6.0 equiv.), and  $\text{MeMgBr}$  (15.0  $\mu\text{L}$ ,  $1.68 \times 10^{-2}$  mmol, 5.0 mol %) were reacted together in 0.5 mL of benzene- $d_6$  in the presence of  $\text{C}_6\text{Me}_6$  standard (50.0  $\mu\text{L}$ , 0.4 M in benzene- $d_6$ ). Complete consumption of  $\text{PhSiH}_3$  was observed after 1 h. The appearance of a multiplet centered at  $\delta = 3.05$  and a peak at  $\delta = 5.27$  in the  $^1\text{H}$  NMR spectrum, indicates 100% conversion to  $\text{PhSiH}(\text{NPy})_2$  after 1 h at ambient temperature.



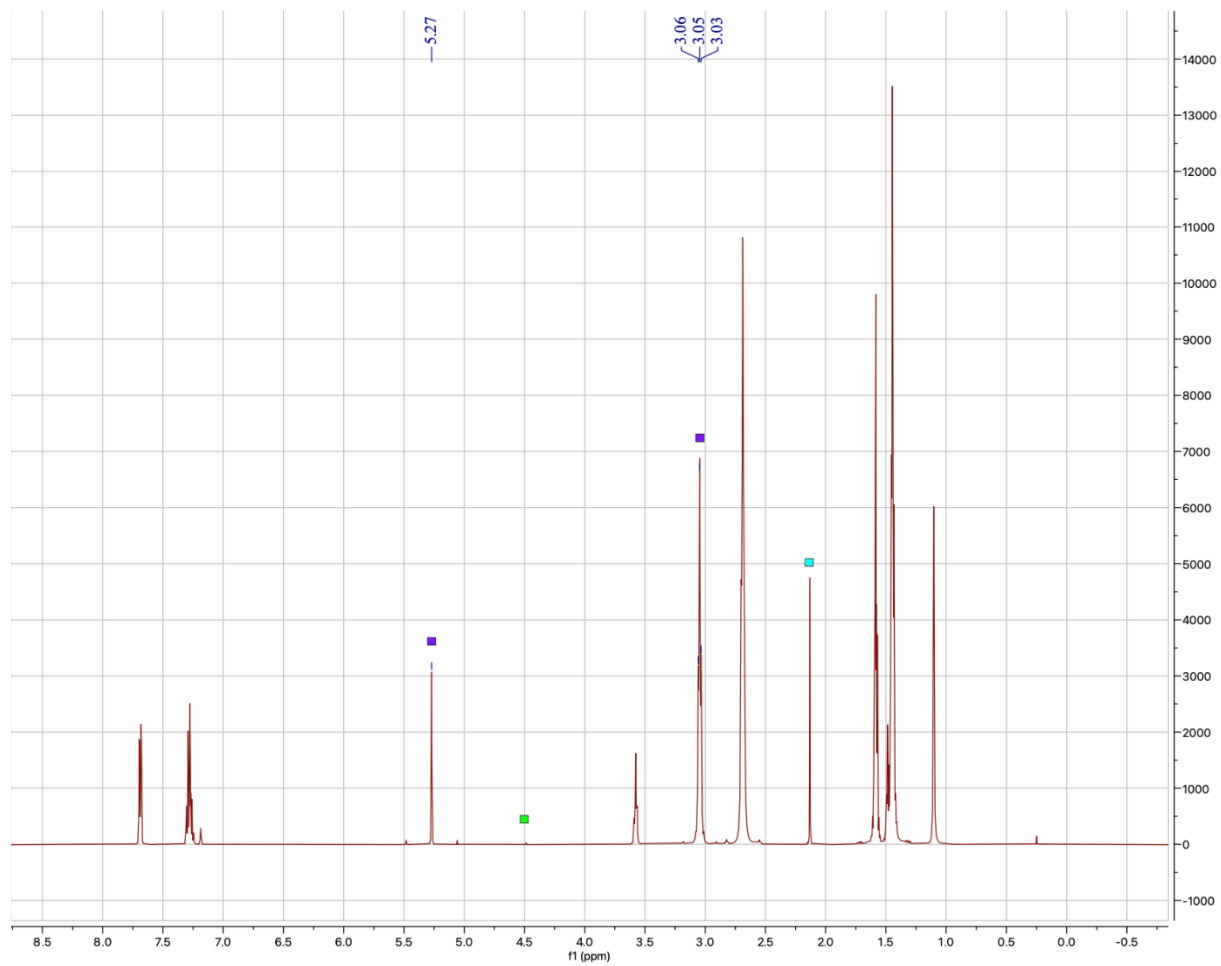

**Figure S.14.** <sup>1</sup>H NMR spectrum of the reaction between PhSiH<sub>3</sub> and PyNH catalyzed by MeMgBr in benzene-*d*<sub>6</sub> after 1 h.

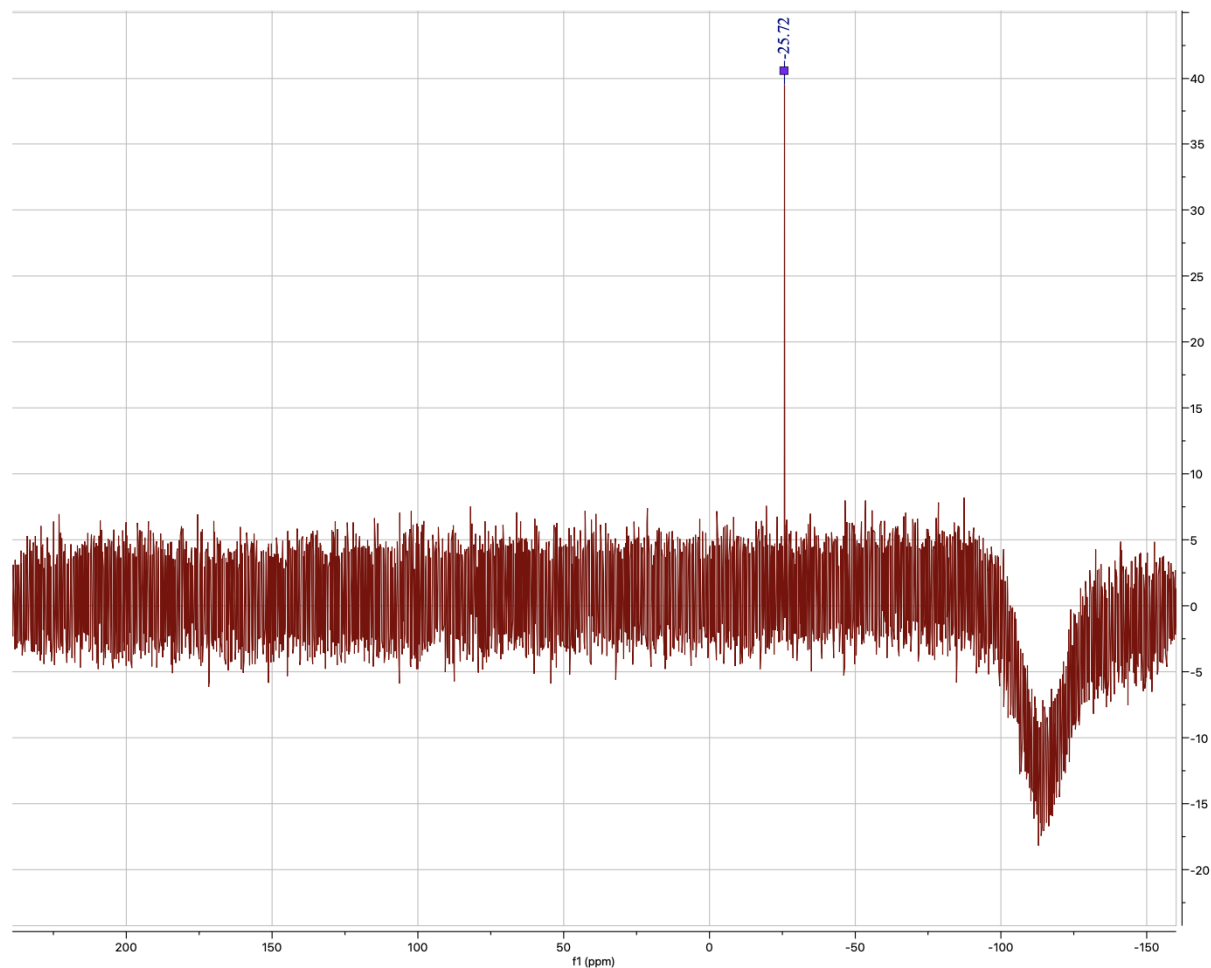

**Figure S.15.**  $^{29}\text{Si}\{^1\text{H}\}$  NMR spectrum of the reaction between  $\text{PhSiH}_3$  and  $\text{PyNH}$  catalyzed by  $\text{MeMgBr}$  in benzene- $d_6$  after 1 h.

### S2.9. $\text{PhSiH}_3$ and $\text{PhNH}_2$

$\text{PhSiH}_3$  (41.0  $\mu\text{L}$ ,  $3.36 \times 10^{-1}$  mmol),  $\text{PhNH}_2$  (188.2  $\mu\text{L}$ ,  $20.16 \times 10^{-1}$  mmol, 6.0 equiv.), and  $\text{MeMgBr}$  (15.0  $\mu\text{L}$ ,  $1.68 \times 10^{-2}$  mmol, 5.0 mol %) were reacted together in 0.5 mL of benzene- $d_6$  in the presence of  $\text{C}_6\text{Me}_6$  standard (50.0  $\mu\text{L}$ , 0.4 M in benzene- $d_6$ ). Lack of formation of hydrogen gas and no new peaks in the  $^1\text{H}$  NMR spectrum indicate no reactivity.

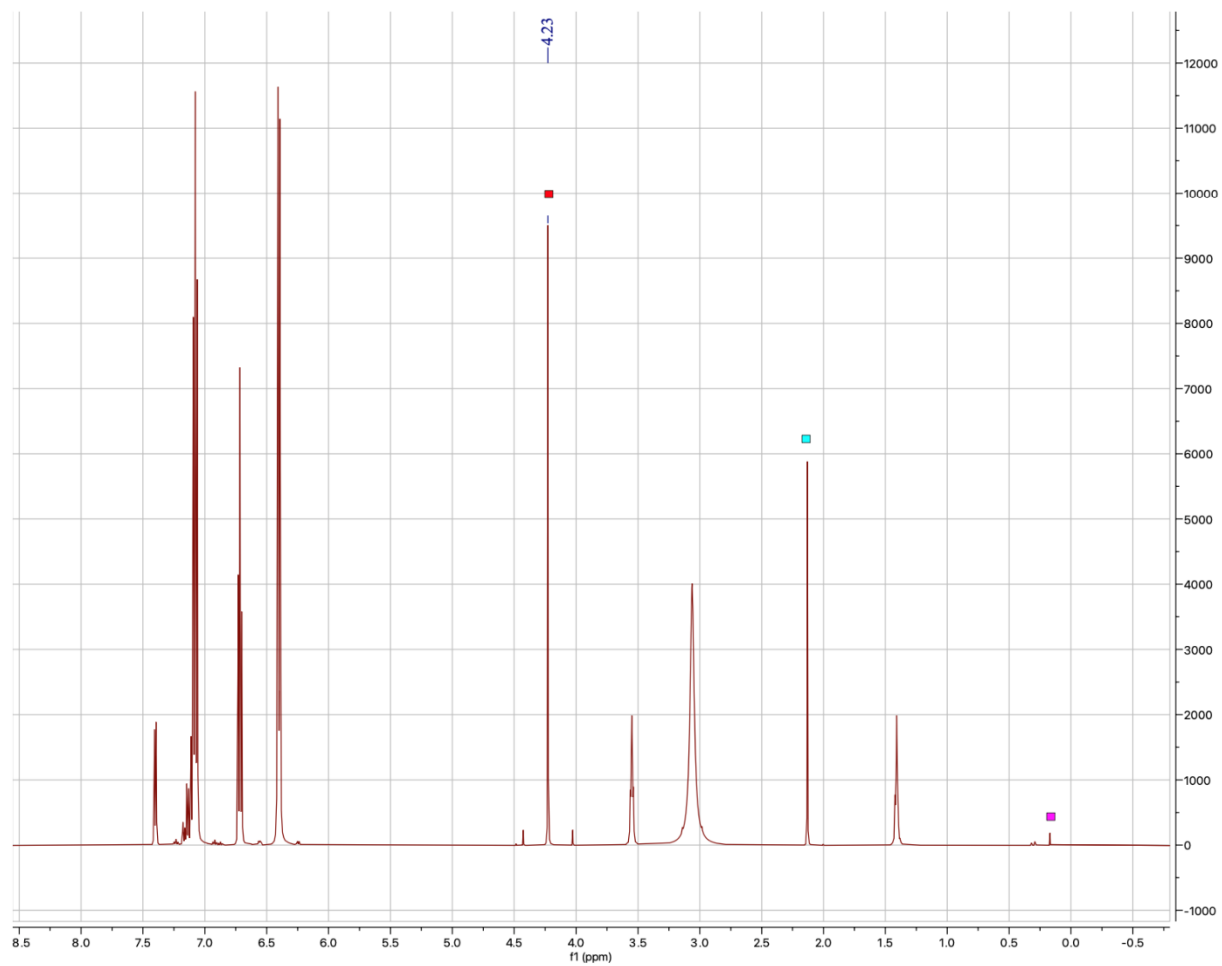

**Figure S.16.**  $^1\text{H}$  NMR spectrum of the reaction between  $\text{PhSiH}_3$  and  $\text{PhNH}_2$  catalyzed by  $\text{MeMgBr}$  in benzene- $d_6$  after 1 h.

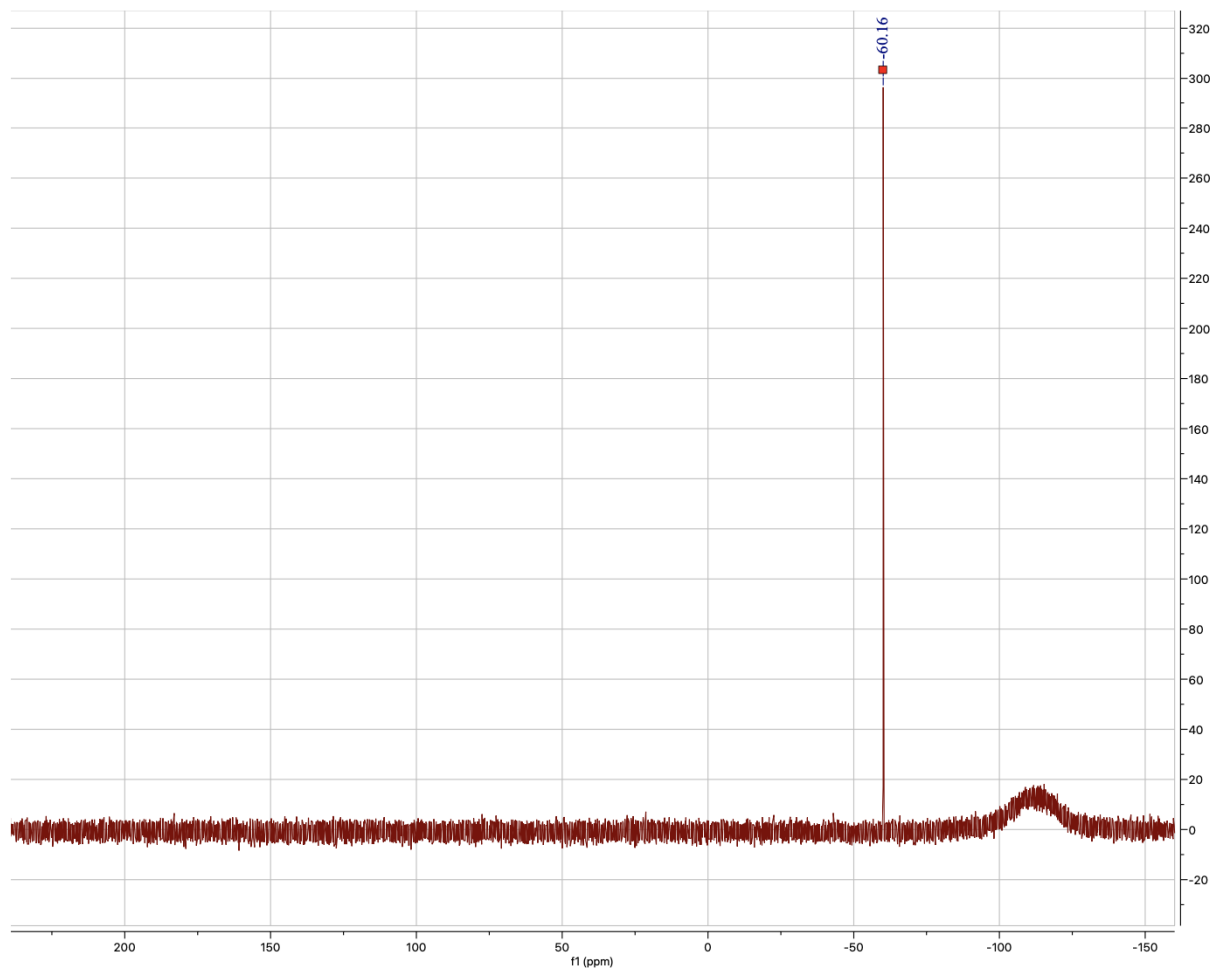

**Figure S.17.**  $^{29}\text{Si}\{^1\text{H}\}$  NMR spectrum of the reaction between  $\text{PhSiH}_3$  and  $\text{PhNH}_2$  catalyzed by  $\text{MeMgBr}$  in benzene- $d_6$  after 1 h.

### S2.10. $\text{Ph}_2\text{SiH}_2$ and $n\text{BuNH}_2$

$\text{Ph}_2\text{SiH}_2$  (62.4  $\mu\text{L}$ ,  $3.36 \times 10^{-1}$  mmol),  $n\text{BuNH}_2$  (134.2  $\mu\text{L}$ ,  $13.44 \times 10^{-1}$  mmol, 4.0 equiv.), and  $\text{MeMgBr}$  (14.7  $\mu\text{L}$ ,  $1.68 \times 10^{-2}$  mmol, 5.0 mol %) were reacted together in 0.5 mL of benzene- $d_6$  in the presence of  $\text{C}_6\text{Me}_6$  standard (50.0  $\mu\text{L}$ , 0.4 M in benzene- $d_6$ ). Complete consumption of  $\text{Ph}_2\text{SiH}_2$  was observed after 1 h. After 1 h at ambient temperature, the appearance of a multiplet centered at  $\delta = 2.91$  in the  $^1\text{H}$  NMR spectrum indicates 20% conversion to  $\text{Ph}_2\text{Si}(\text{NH}^n\text{Bu})_2$  and the appearance of a multiplet centered between at  $\delta = 2.76$  and  $\delta = 2.77$  and a doublet centered at  $\delta = 5.56$  in the  $^1\text{H}$  NMR spectrum, indicates 80% conversion to  $\text{Ph}_2\text{SiH}(\text{NH}^n\text{Bu})$ .

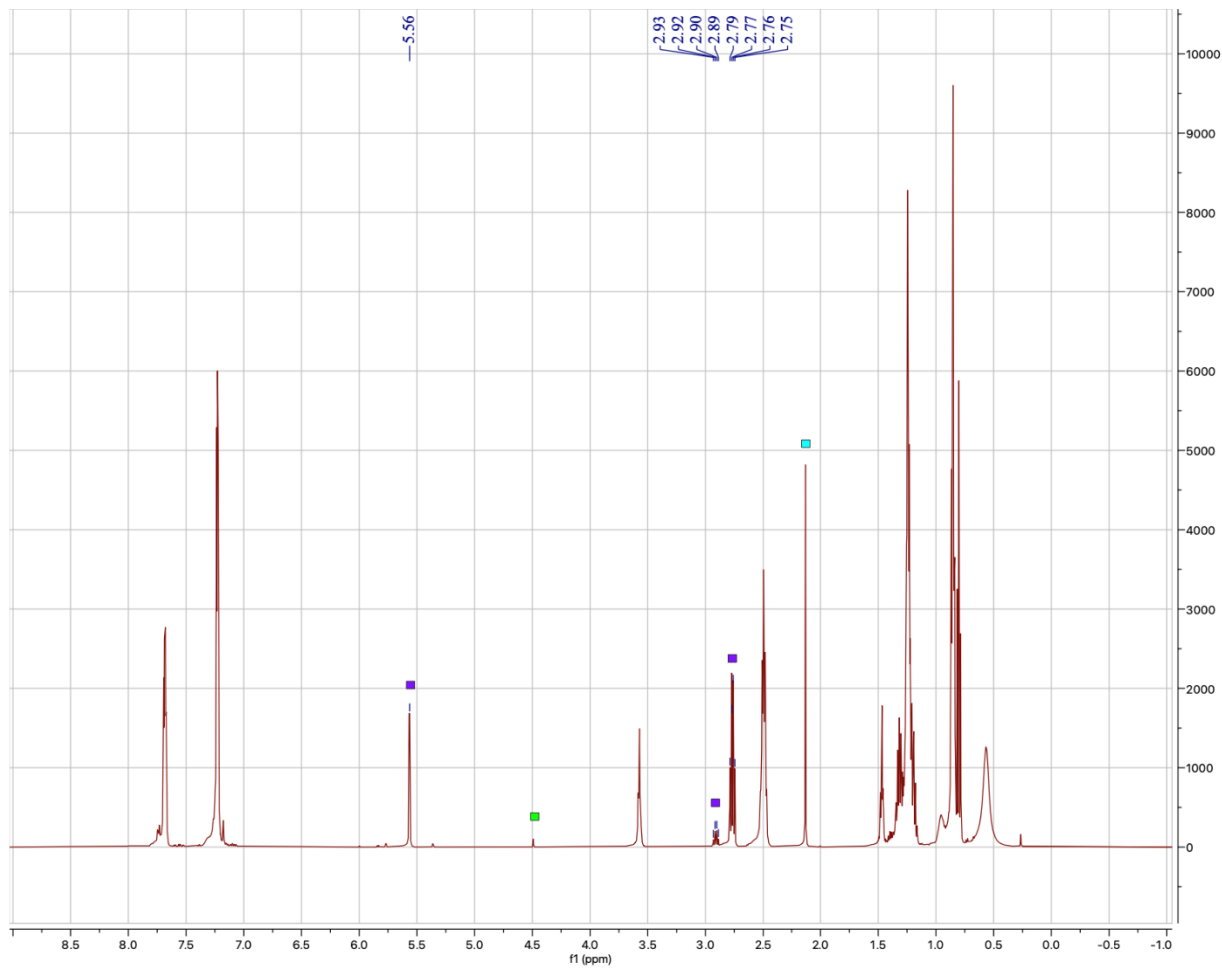

**Figure S.18.** <sup>1</sup>H NMR spectrum of the reaction between Ph<sub>2</sub>SiH<sub>2</sub> and <sup>n</sup>BuNH<sub>2</sub> catalyzed by MeMgBr in benzene-*d*<sub>6</sub> after 1 h.

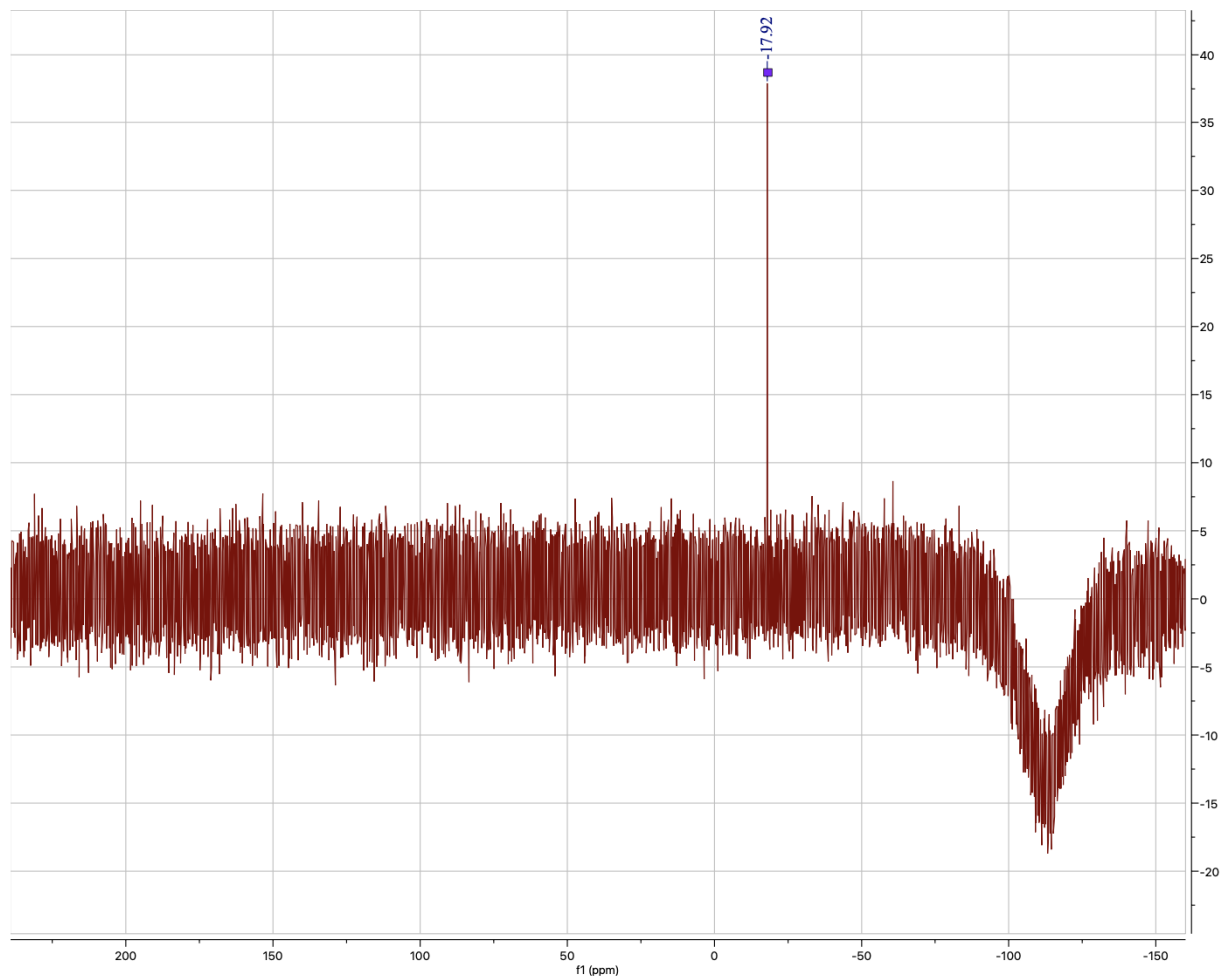

**Figure S.19.**  $^{29}\text{Si}\{^1\text{H}\}$  NMR spectrum of the reaction between  $\text{Ph}_2\text{SiH}_2$  and  $^t\text{BuNH}_2$  catalyzed by  $\text{MeMgBr}$  in benzene- $d_6$  after 1 h.

### S2.11. $\text{Ph}_2\text{SiH}_2$ and $^t\text{BuNH}_2$

$\text{Ph}_2\text{SiH}_2$  (62.4  $\mu\text{L}$ ,  $3.36 \times 10^{-1}$  mmol),  $^t\text{BuNH}_2$  (141.2  $\mu\text{L}$ ,  $13.44 \times 10^{-1}$  mmol, 4.0 equiv.), and  $\text{MeMgBr}$  (14.7  $\mu\text{L}$ ,  $1.68 \times 10^{-2}$  mmol, 5.0 mol %) were reacted together in 0.5 mL of benzene- $d_6$  in the presence of  $\text{C}_6\text{Me}_6$  standard (50.0  $\mu\text{L}$ , 0.4 M in benzene- $d_6$ ). Incomplete consumption of  $\text{Ph}_2\text{SiH}_2$  was observed after 1 h, as determined by the presence of the SiH peak at  $\delta = 5.05$  in the  $^1\text{H}$  NMR spectrum. After 1 h at ambient temperature, the appearance of a peak at  $\delta = 1.13$  in the  $^1\text{H}$  NMR spectrum indicates 50% conversion to  $\text{Ph}_2\text{SiH}(\text{NH}^t\text{Bu})$ . Spectra were consistent with previous reports of these compounds.<sup>2,7</sup>

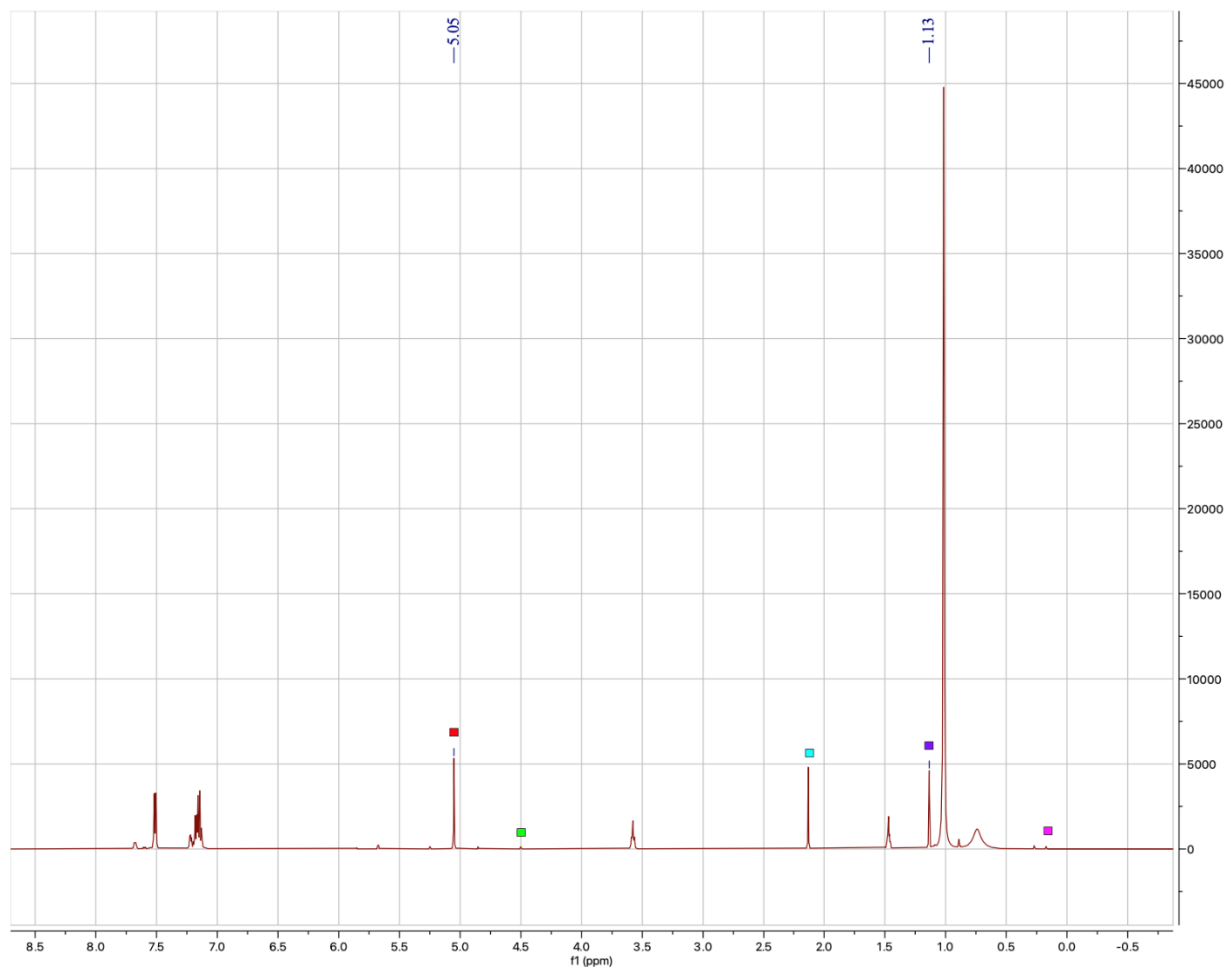

**Figure S.20.** <sup>1</sup>H NMR spectrum of the reaction between Ph<sub>2</sub>SiH<sub>2</sub> and <sup>t</sup>BuNH<sub>2</sub> catalyzed by MeMgBr in benzene-*d*<sub>6</sub> after 1 h.

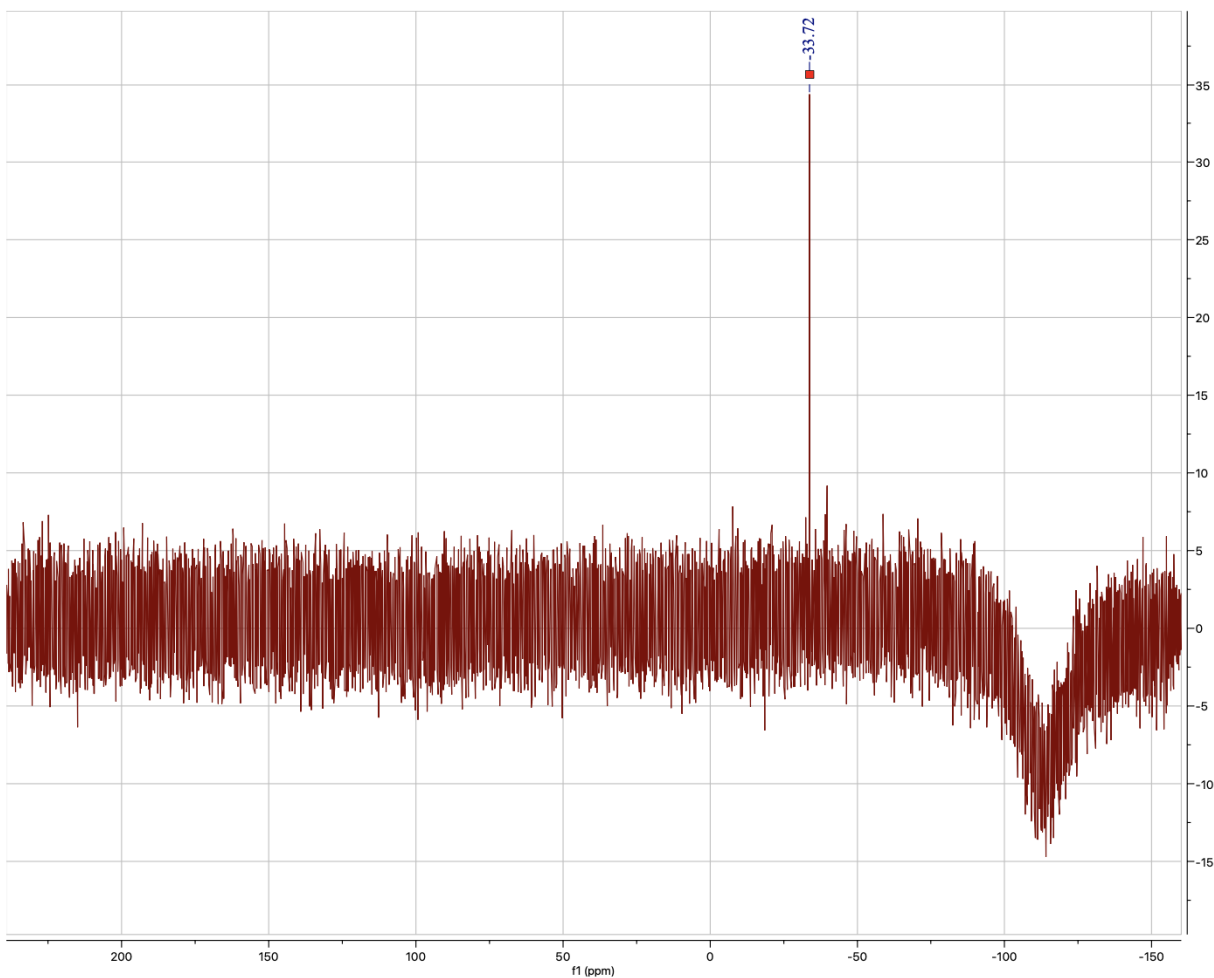

**Figure S.21.**  $^{29}\text{Si}\{^1\text{H}\}$  NMR spectrum of the reaction between  $\text{Ph}_2\text{SiH}_2$  and  $t\text{BuNH}_2$  catalyzed by  $\text{MeMgBr}$  in benzene- $d_6$  after 1 h.

### S2.12. $\text{Ph}_2\text{SiH}_2$ and $\text{PyNH}$

$\text{Ph}_2\text{SiH}_2$  (62.4  $\mu\text{L}$ ,  $3.36 \times 10^{-1}$  mmol),  $\text{PyNH}$  (112.2  $\mu\text{L}$ ,  $13.44 \times 10^{-1}$  mmol, 4.0 equiv.), and  $\text{MeMgBr}$  (14.7  $\mu\text{L}$ ,  $1.68 \times 10^{-2}$  mmol, 5.0 mol %) were reacted together in 0.5 mL of benzene- $d_6$  in the presence of  $\text{C}_6\text{Me}_6$  standard (50.0  $\mu\text{L}$ , 0.4 M in benzene- $d_6$ ). Complete consumption of  $\text{Ph}_2\text{SiH}_2$  was observed after 1 h. The appearance of a multiplet centered at  $\delta = 3.01$  and a peak at  $\delta = 5.60$  in the  $^1\text{H}$  NMR spectrum, indicates 100% conversion to  $\text{Ph}_2\text{SiH}(\text{NPy})$  after 1 h at ambient temperature.



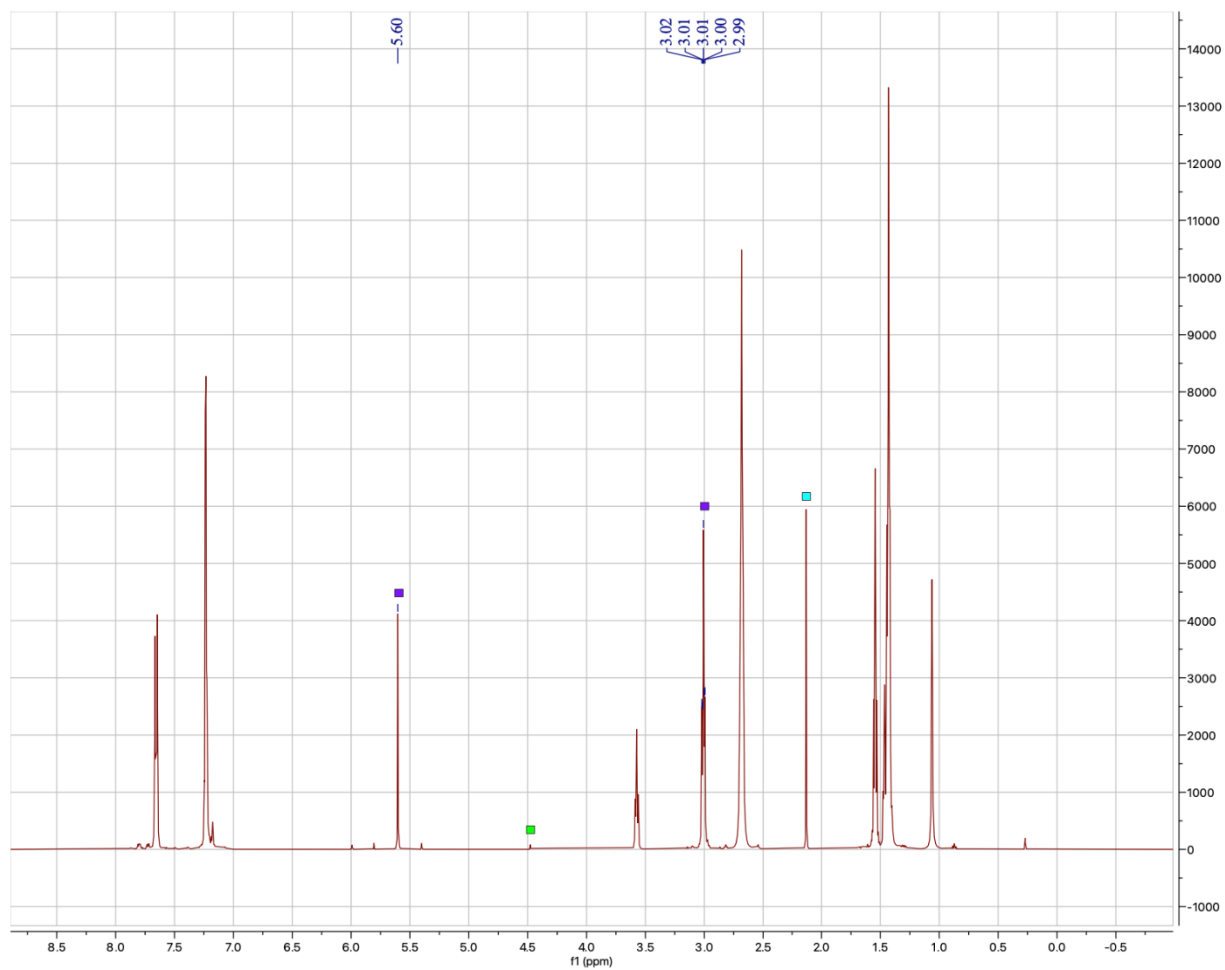

**Figure S.22.**  $^1\text{H}$  NMR spectrum of the reaction between  $\text{Ph}_2\text{SiH}_2$  and  $\text{PyNH}$  catalyzed by  $\text{MeMgBr}$  in benzene- $d_6$  after 1 h.

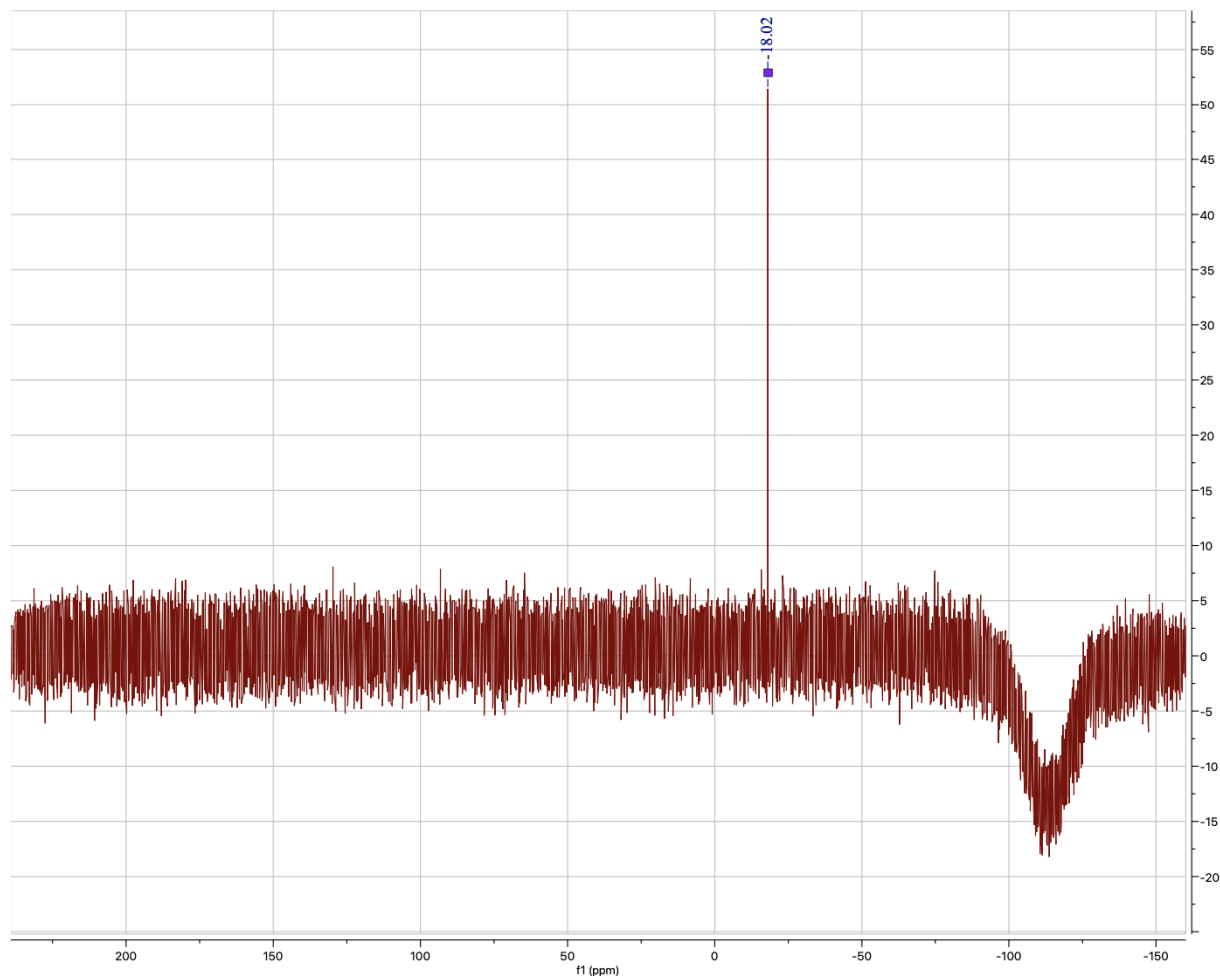

**Figure S.23.**  $^{29}\text{Si}\{^1\text{H}\}$  NMR spectrum of the reaction between  $\text{Ph}_2\text{SiH}_2$  and  $\text{PyNH}$  catalyzed by  $\text{MeMgBr}$  in benzene- $d_6$  after 1 h.

### S2.13. $\text{Ph}_2\text{SiH}_2$ and $\text{Et}_2\text{NH}$

$\text{Ph}_2\text{SiH}_2$  (62.4  $\mu\text{L}$ ,  $3.36 \times 10^{-1}$  mmol),  $\text{Et}_2\text{NH}$  (139.0  $\mu\text{L}$ ,  $13.44 \times 10^{-1}$  mmol, 4.0 equiv.), and  $\text{MeMgBr}$  (14.7  $\mu\text{L}$ ,  $1.68 \times 10^{-2}$  mmol, 5.0 mol %) were reacted together in 0.5 mL of benzene- $d_6$  in the presence of  $\text{C}_6\text{Me}_6$  standard (50.0  $\mu\text{L}$ , 0.4 M in benzene- $d_6$ ). Incomplete consumption of  $\text{Ph}_2\text{SiH}_2$  was observed after 1 h, as determined by the presence of the SiH peak at  $\delta = 5.05$  in the  $^1\text{H}$  NMR spectrum. The appearance of a diagnostic quartet centered between  $\delta = 2.90$  and  $\delta = 2.91$  in the  $^1\text{H}$  NMR spectrum indicates 27% conversion to  $\text{Ph}_2\text{SiH}(\text{NEt}_2)$  after 1 h at ambient temperature. Spectra were consistent with previous reports of this compound.<sup>2,6</sup>

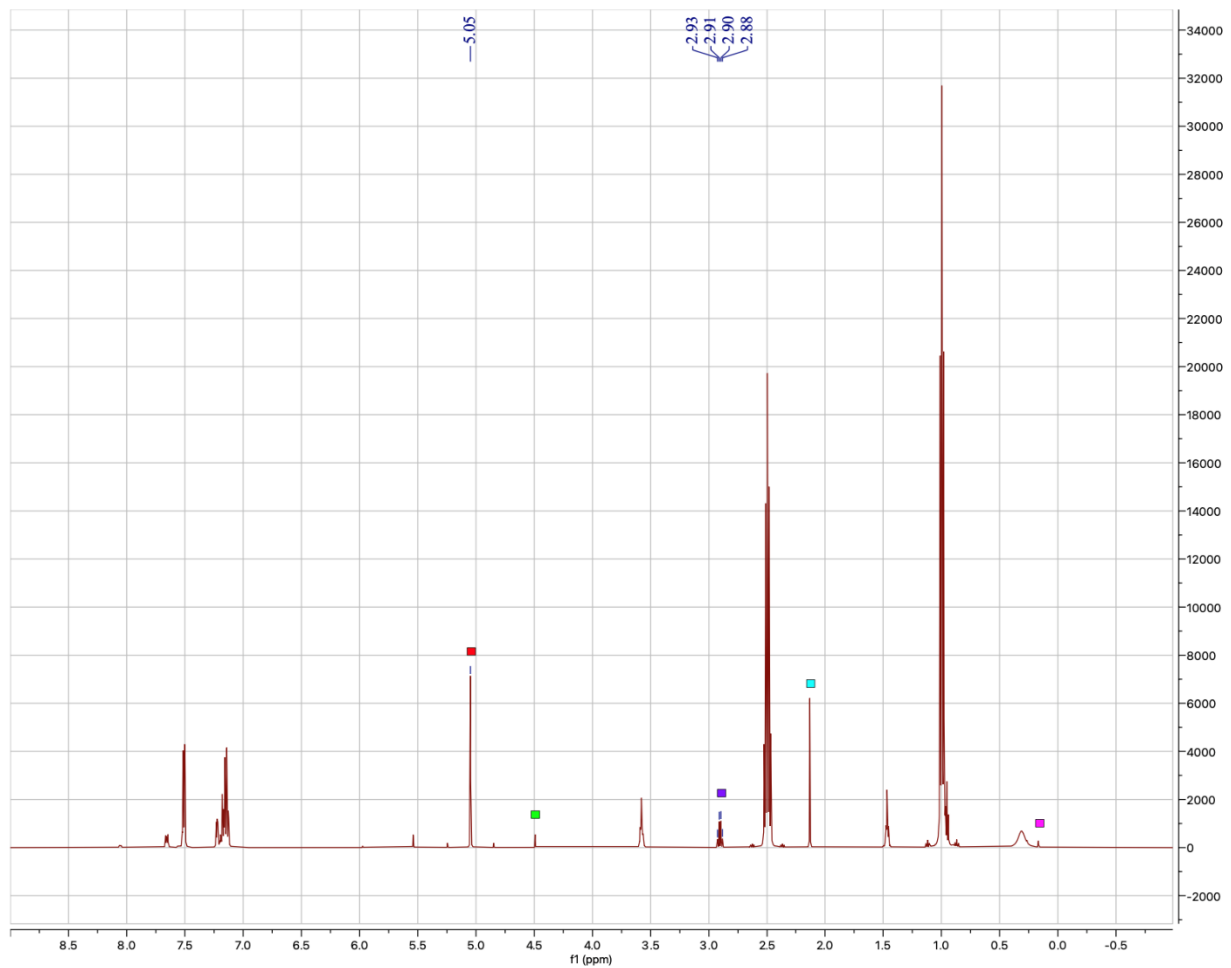

**Figure S.24.**  $^1\text{H}$  NMR spectrum of the reaction between  $\text{Ph}_2\text{SiH}_2$  and  $\text{Et}_2\text{NH}$  catalyzed by  $\text{MeMgBr}$  in benzene- $d_6$  after 1 h.

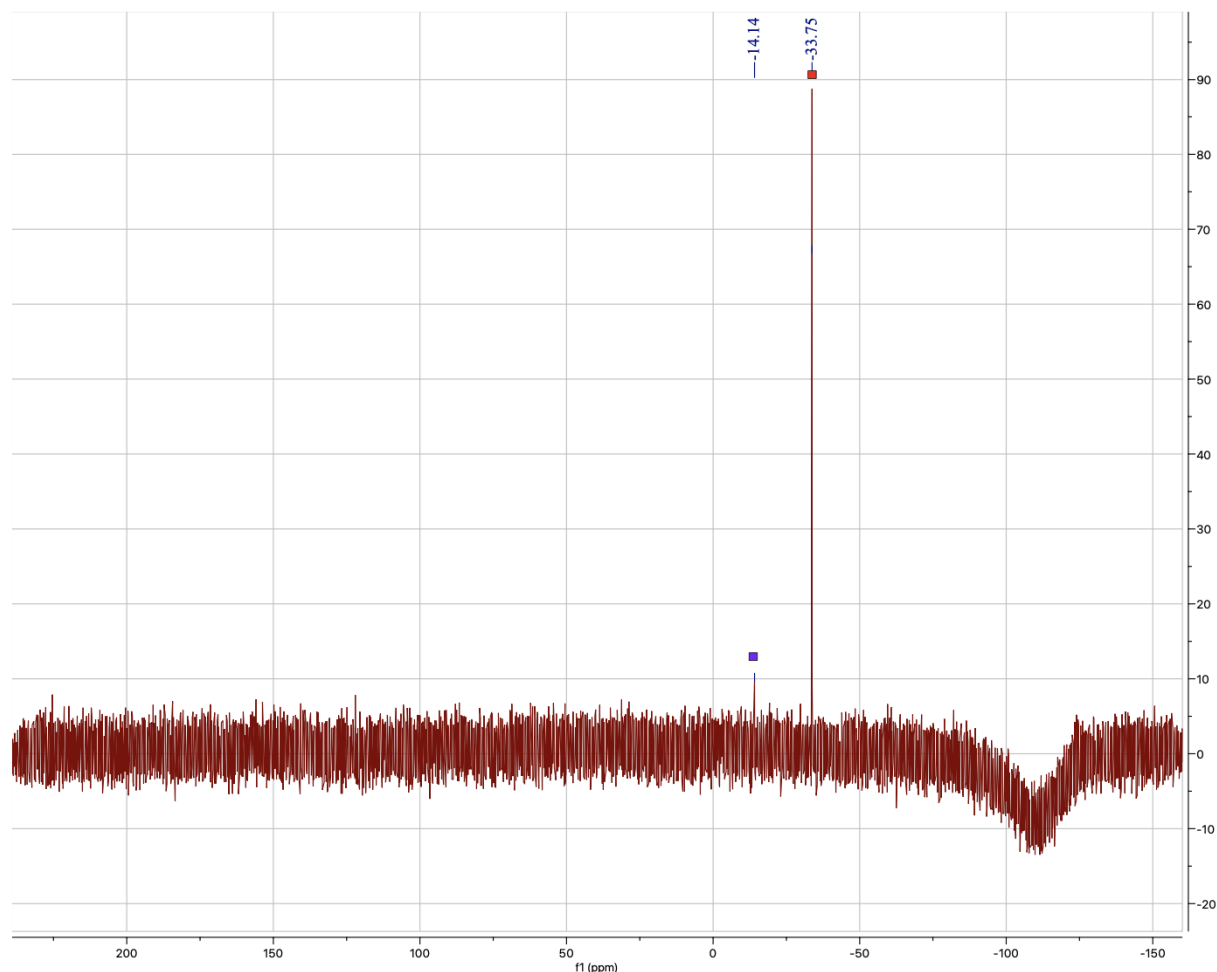

**Figure S.25.**  $^{29}\text{Si}\{^1\text{H}\}$  NMR spectrum of the reaction between  $\text{Ph}_2\text{SiH}_2$  and  $\text{Et}_2\text{NH}$  catalyzed by  $\text{MeMgBr}$  in benzene- $d_6$  after 1 h.

#### S2.14. $\text{PhMeSiH}_2$ and $n\text{BuNH}_2$

$\text{PhMeSiH}_2$  ( $46.1 \mu\text{L}$ ,  $3.36 \times 10^{-1} \text{ mmol}$ ),  $n\text{BuNH}_2$  ( $134.2 \mu\text{L}$ ,  $13.44 \times 10^{-1} \text{ mmol}$ , 4.0 equiv.), and  $\text{MeMgBr}$  ( $14.7 \mu\text{L}$ ,  $1.68 \times 10^{-2} \text{ mmol}$ , 5.0 mol %) were reacted together in 0.5 mL of benzene- $d_6$  in the presence of  $\text{C}_6\text{Me}_6$  standard ( $50.0 \mu\text{L}$ , 0.4 M in benzene- $d_6$ ). Complete consumption of  $\text{PhMeSiH}_2$  was observed after 1 h. The appearance of a multiplet centered at  $\delta = 2.81$  and a quartet centered at  $\delta = 2.69$  in the  $^1\text{H}$  NMR spectrum indicates 45% conversion to  $\text{PhMeSi}(\text{NH}n\text{Bu})_2$  and 55% conversion to  $\text{PhMeSiH}(\text{NH}n\text{Bu})$  after 1 h at ambient temperature.

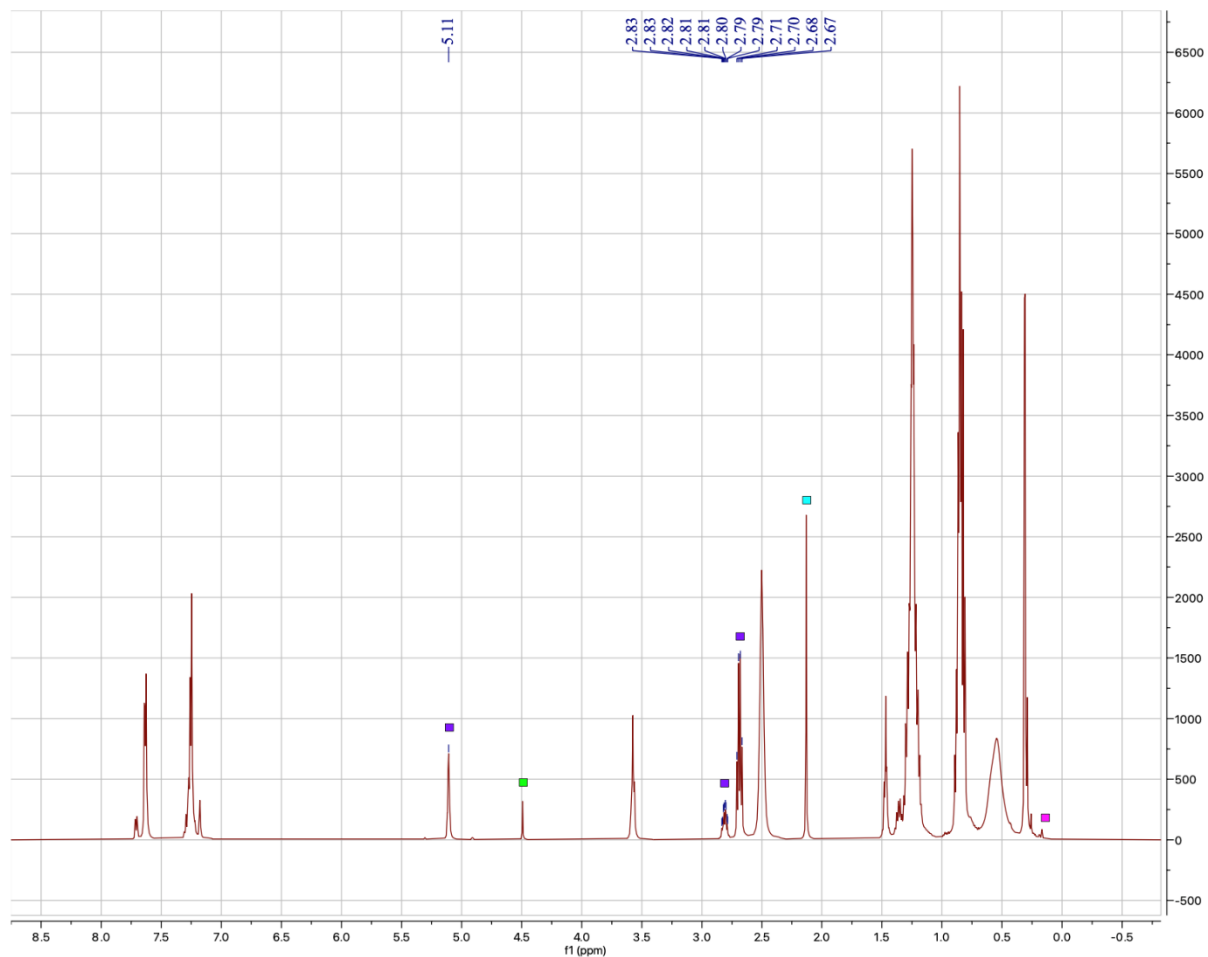

**Figure S.26.**  $^1\text{H}$  NMR spectrum of the reaction between  $\text{PhMeSiH}_2$  and  $t\text{BuNH}_2$  catalyzed by  $\text{MeMgBr}$  in benzene- $d_6$  after 1 h.

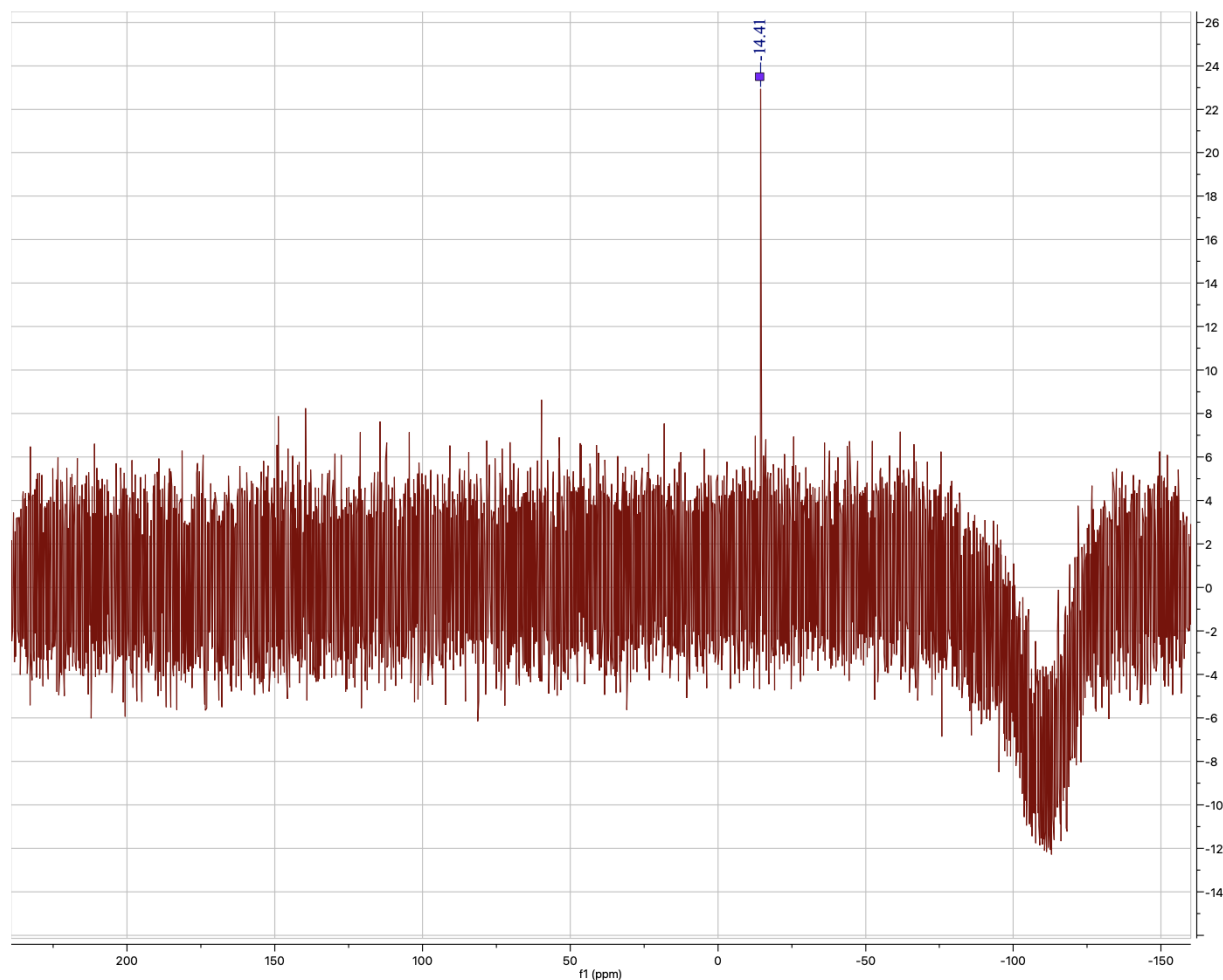

**Figure S.27.**  $^{29}\text{Si}\{^1\text{H}\}$  NMR spectrum of the reaction between  $\text{PhMeSiH}_2$  and  $t\text{BuNH}_2$  catalyzed by  $\text{MeMgBr}$  in benzene- $d_6$  after 1 h.

### S2.15. $\text{PhMeSiH}_2$ and $t\text{BuNH}_2$

$\text{PhMeSiH}_2$  ( $46.1 \mu\text{L}$ ,  $3.36 \times 10^{-1} \text{ mmol}$ ),  $t\text{BuNH}_2$  ( $141.2 \mu\text{L}$ ,  $13.44 \times 10^{-1} \text{ mmol}$ , 4.0 equiv.), and  $\text{MeMgBr}$  ( $14.7 \mu\text{L}$ ,  $1.68 \times 10^{-2} \text{ mmol}$ , 5.0 mol %) were reacted together in 0.5 mL of benzene- $d_6$  in the presence of  $\text{C}_6\text{Me}_6$  standard ( $50.0 \mu\text{L}$ , 0.4 M in benzene- $d_6$ ). Incomplete consumption of  $\text{PhMeSiH}_2$  was observed after 1 h, as determined by the presence of the SiH peak at  $\delta = 4.45$  in the  $^1\text{H}$  NMR spectrum. After 1 h at ambient temperature, the appearance of a peak at  $\delta = 1.10$  in the  $^1\text{H}$  NMR spectrum indicates 29% conversion to  $\text{PhMeSiH}(\text{NH}t\text{Bu})$ . Spectra were consistent with previous reports of these compounds.<sup>2,7</sup>

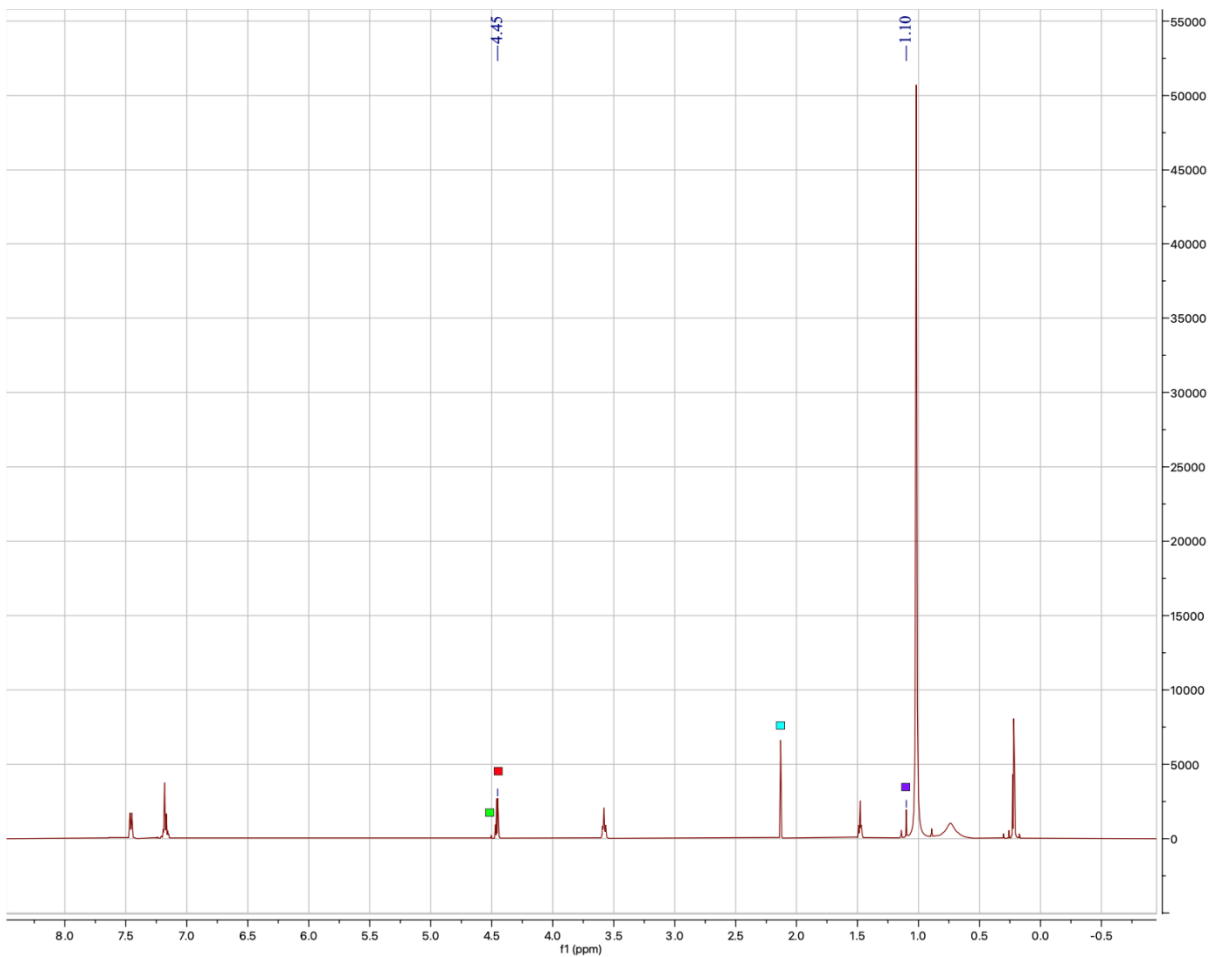

**Figure S.28.**  $^1\text{H}$  NMR spectrum of the reaction between  $\text{PhMeSiH}_2$  and  $t\text{BuNH}_2$  catalyzed by  $\text{MeMgBr}$  in benzene- $d_6$  after 1 h.

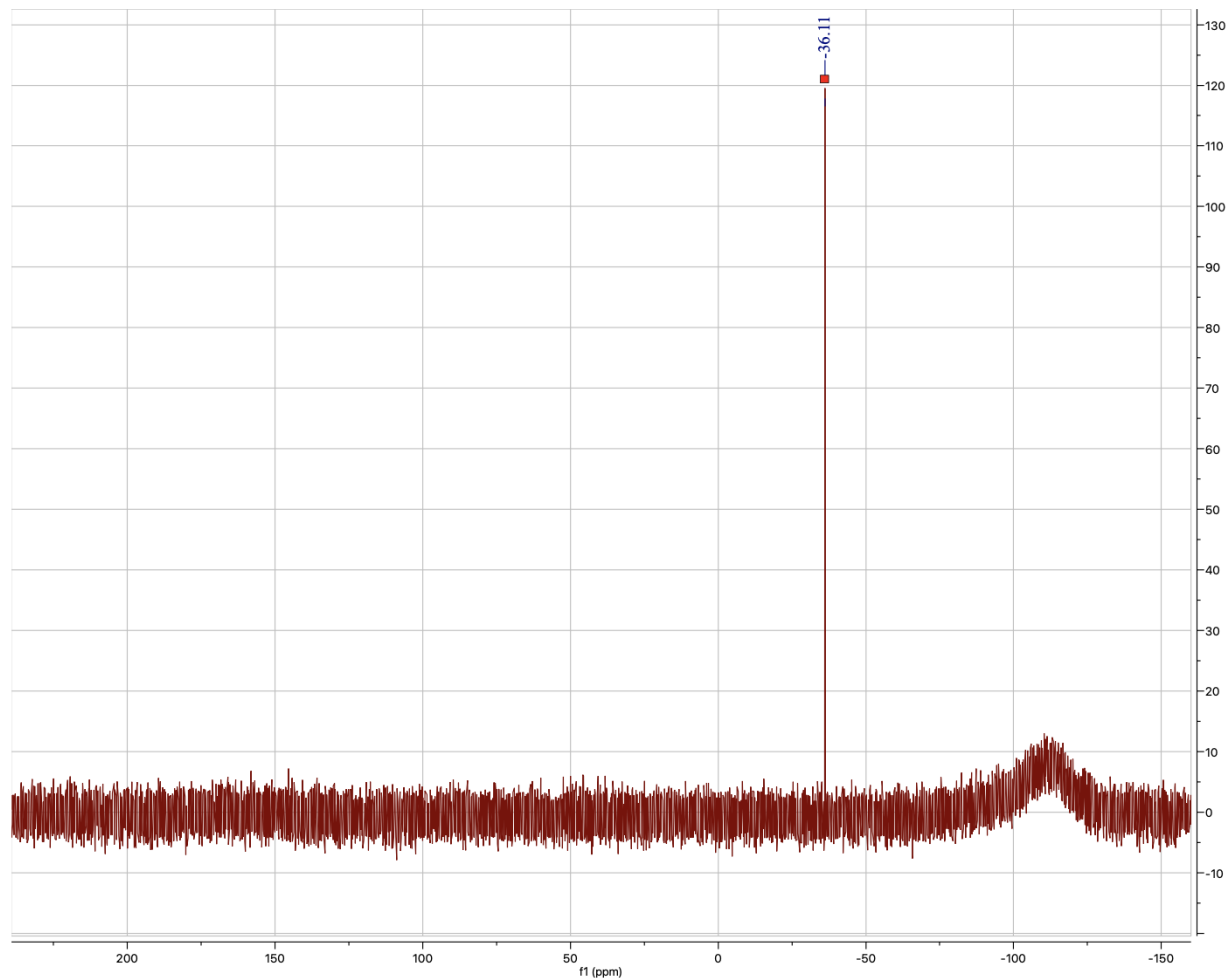

**Figure S.29.**  $^{29}\text{Si}\{^1\text{H}\}$  NMR spectrum of the reaction between  $\text{PhMeSiH}_2$  and  $^t\text{BuNH}_2$  catalyzed by  $\text{MeMgBr}$  in benzene- $d_6$  after 1 h.

### S2.16. $\text{PhMeSiH}_2$ and $\text{PyNH}$

$\text{PhMeSiH}_2$  (46.1  $\mu\text{L}$ ,  $3.36 \times 10^{-1}$  mmol),  $\text{PyNH}$  (112.2  $\mu\text{L}$ ,  $13.44 \times 10^{-1}$  mmol, 4.0 equiv.), and  $\text{MeMgBr}$  (14.7  $\mu\text{L}$ ,  $1.68 \times 10^{-2}$  mmol, 5.0 mol %) were reacted together in 0.5 mL of benzene- $d_6$  in the presence of  $\text{C}_6\text{Me}_6$  standard (50.0  $\mu\text{L}$ , 0.4 M in benzene- $d_6$ ). Complete consumption of  $\text{PhMeSiH}_2$  was observed after 1 h. The appearance of a multiplet centered between  $\delta = 2.93$  and  $\delta = 2.94$  and a quartet centered between  $\delta = 5.13$  and  $\delta = 5.14$  in the  $^1\text{H}$  NMR spectrum, indicates 100% conversion to  $\text{PhMeSiH}(\text{NPy})$  after 1 h at ambient temperature.



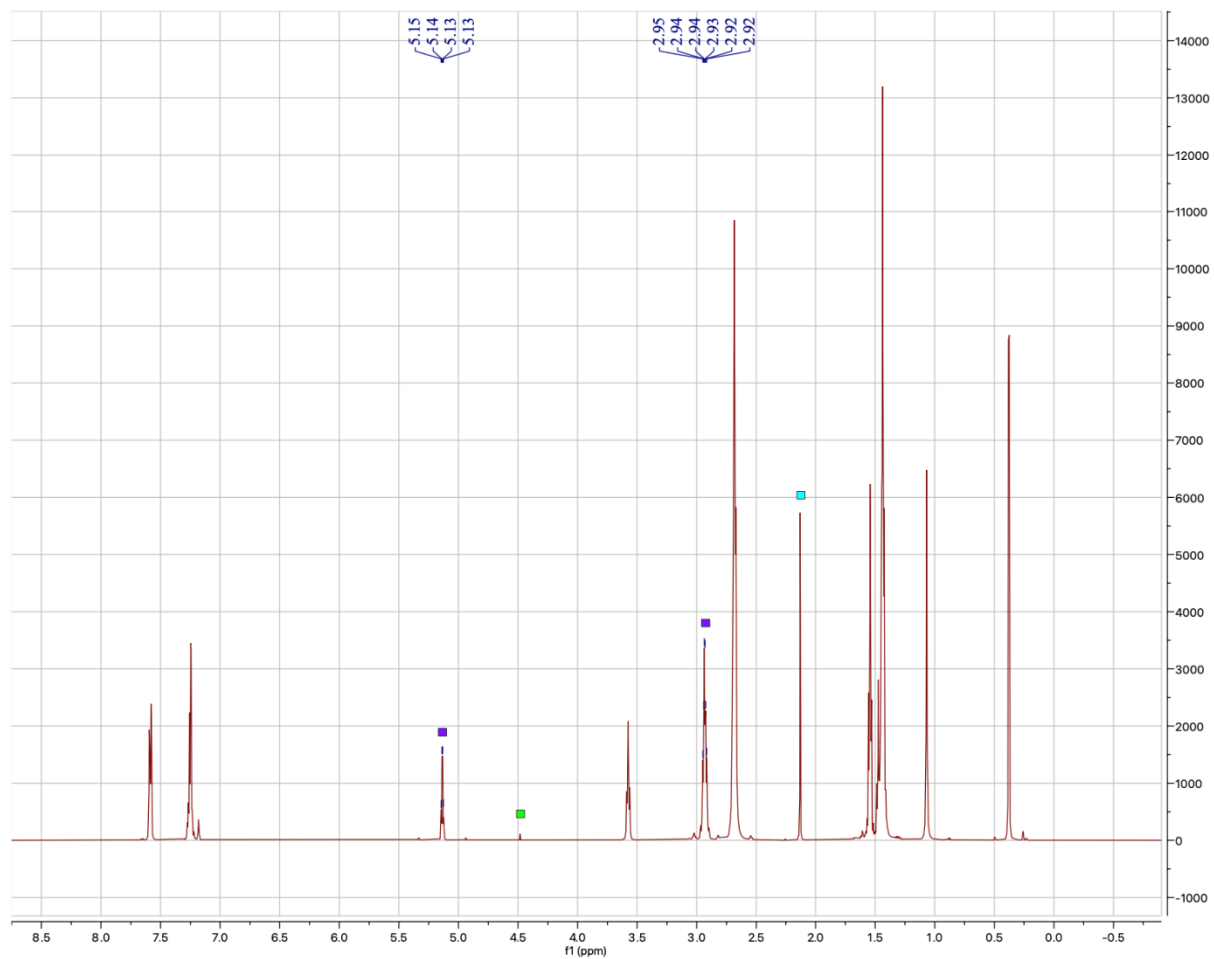

**Figure S.30.**  $^1\text{H}$  NMR spectrum of the reaction between  $\text{PhMeSiH}_2$  and  $\text{PyNH}$  catalyzed by  $\text{MeMgBr}$  in benzene- $d_6$  after 1 h.

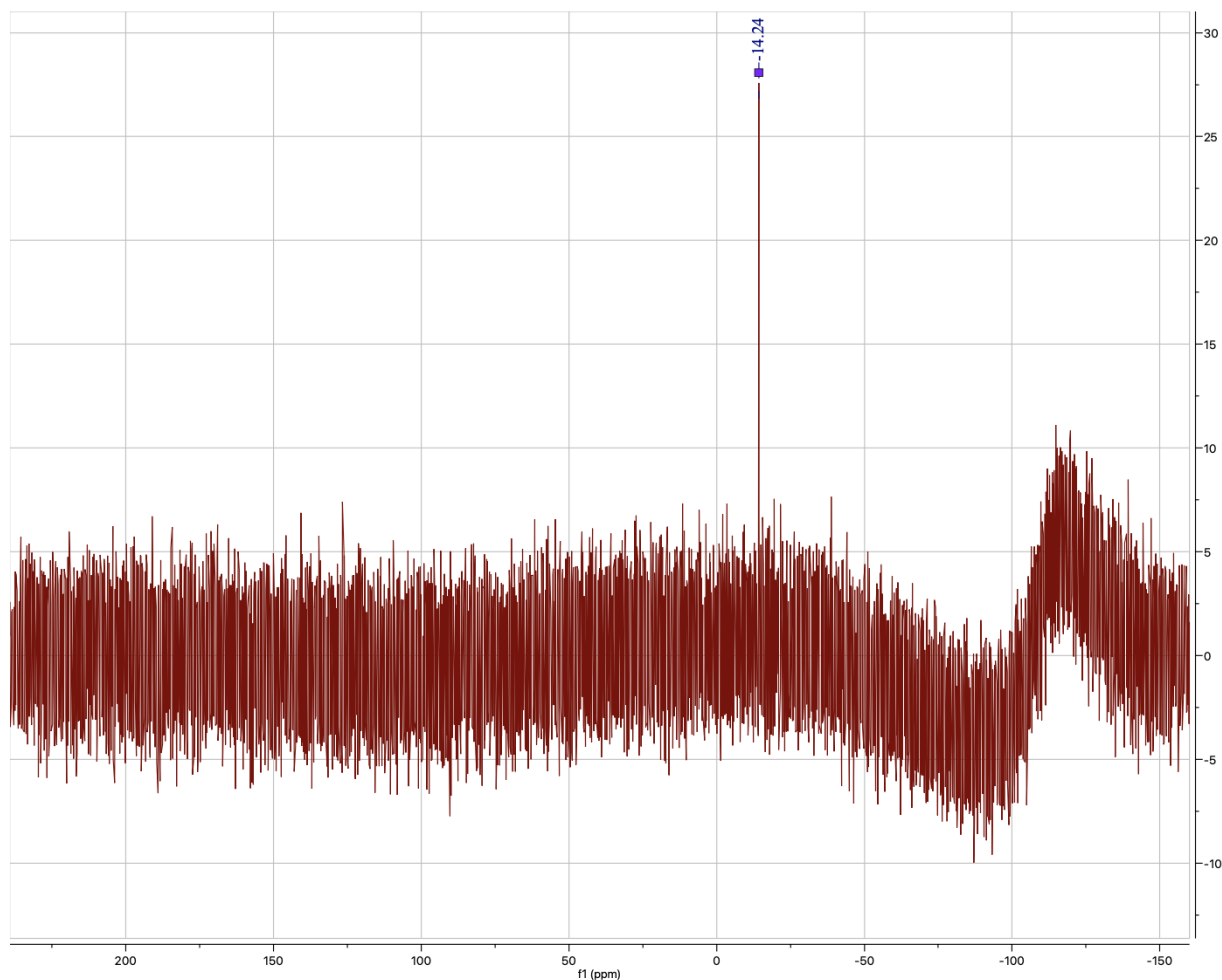

**Figure S.31.**  $^{29}\text{Si}\{^1\text{H}\}$  NMR spectrum of the reaction between  $\text{PhMeSiH}_2$  and  $\text{PyNH}$  catalyzed by  $\text{MeMgBr}$  in benzene- $d_6$  after 1 h.

### S2.17. $\text{PhMeSiH}_2$ and $\text{Et}_2\text{NH}$

$\text{PhMeSiH}_2$  ( $46.1 \mu\text{L}$ ,  $3.36 \times 10^{-1}$  mmol),  $\text{Et}_2\text{NH}$  ( $139.0 \mu\text{L}$ ,  $13.44 \times 10^{-1}$  mmol, 4.0 equiv.), and  $\text{MeMgBr}$  ( $14.7 \mu\text{L}$ ,  $1.68 \times 10^{-2}$  mmol, 5.0 mol %) were reacted together in 0.5 mL of benzene- $d_6$  in the presence of  $\text{C}_6\text{Me}_6$  standard ( $50.0 \mu\text{L}$ , 0.4 M in benzene- $d_6$ ). Incomplete consumption of  $\text{PhMeSiH}_2$  was observed after 1 h, as determined by the presence of the  $\text{SiH}$  peak at  $\delta = 4.45$  in the  $^1\text{H}$  NMR spectrum. The appearance of a diagnostic quartet centered between  $\delta = 2.81$  and  $\delta = 2.82$  in the  $^1\text{H}$  NMR spectrum indicates 60% conversion to  $\text{PhMeSiH}(\text{NEt}_2)$  after 1 h at ambient temperature. Spectra were consistent with previous reports of this compound.<sup>2,6</sup>

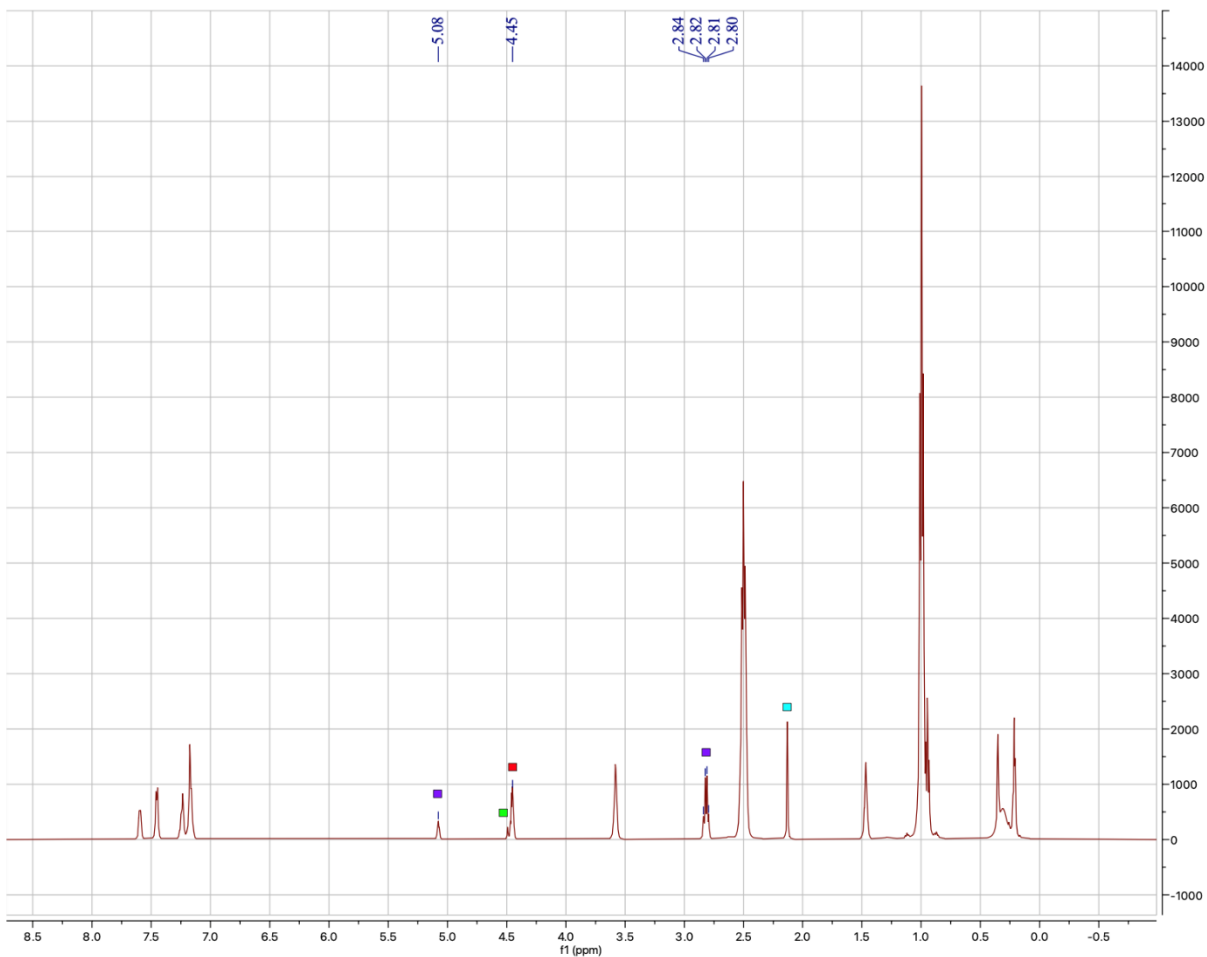

**Figure S.32.** <sup>1</sup>H NMR spectrum of the reaction between PhMeSiH<sub>2</sub> and Et<sub>2</sub>NH catalyzed by MeMgBr in benzene-*d*<sub>6</sub> after 1 h.

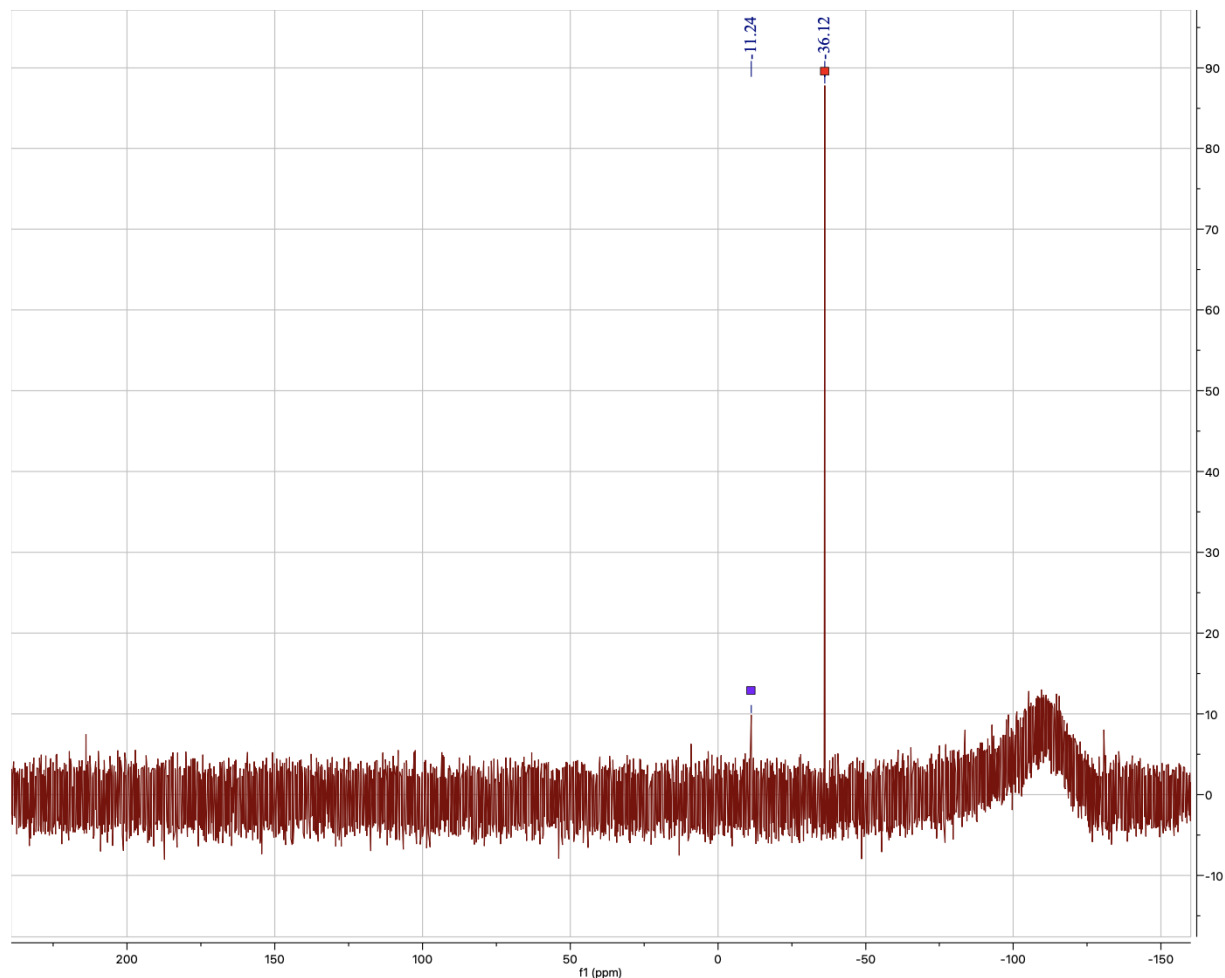

**Figure S.33.**  $^{29}\text{Si}\{^1\text{H}\}$  NMR spectrum of the reaction between  $\text{PhMeSiH}_2$  and  $\text{Et}_2\text{NH}$  catalyzed by  $\text{MeMgBr}$  in benzene- $d_6$  after 1 h.

### S2.18. $\text{Ph}_3\text{SiH}$ and $^t\text{BuNH}_2$

$\text{Ph}_3\text{SiH}$  (100  $\mu\text{L}$ , 3.36 M in benzene- $d_6$ ,  $3.36 \times 10^{-1}$  mmol),  $^t\text{BuNH}_2$  (70.6  $\mu\text{L}$ ,  $6.72 \times 10^{-1}$  mmol, 2.0 equiv.), and  $\text{MeMgBr}$  (14.7  $\mu\text{L}$ ,  $1.68 \times 10^{-2}$  mmol, 5.0 mol %) were reacted together in 0.5 mL of benzene- $d_6$  in the presence of  $\text{C}_6\text{Me}_6$  standard (50.0  $\mu\text{L}$ , 0.4 M in benzene- $d_6$ ). Lack of formation of hydrogen gas and no new peaks in the  $^1\text{H}$  NMR spectrum indicate no reactivity despite heating overnight at 40  $^\circ\text{C}$ .

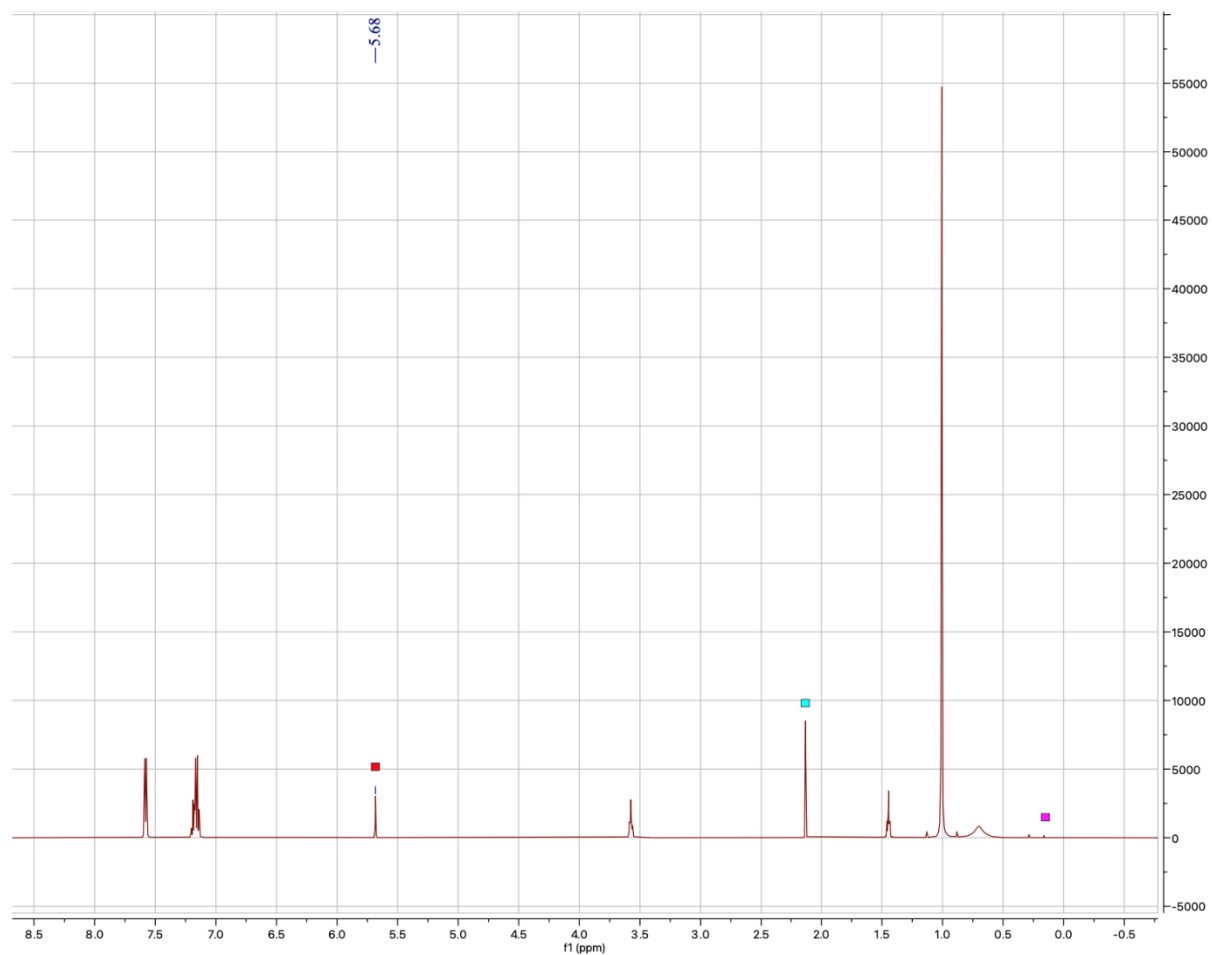

**Figure S.36.**  $^1\text{H}$  NMR spectrum of the reaction between  $\text{Ph}_3\text{SiH}$  and  $t\text{BuNH}_2$  catalyzed by  $\text{MeMgBr}$  in benzene- $d_6$  after overnight heating at  $40\text{ }^\circ\text{C}$ .

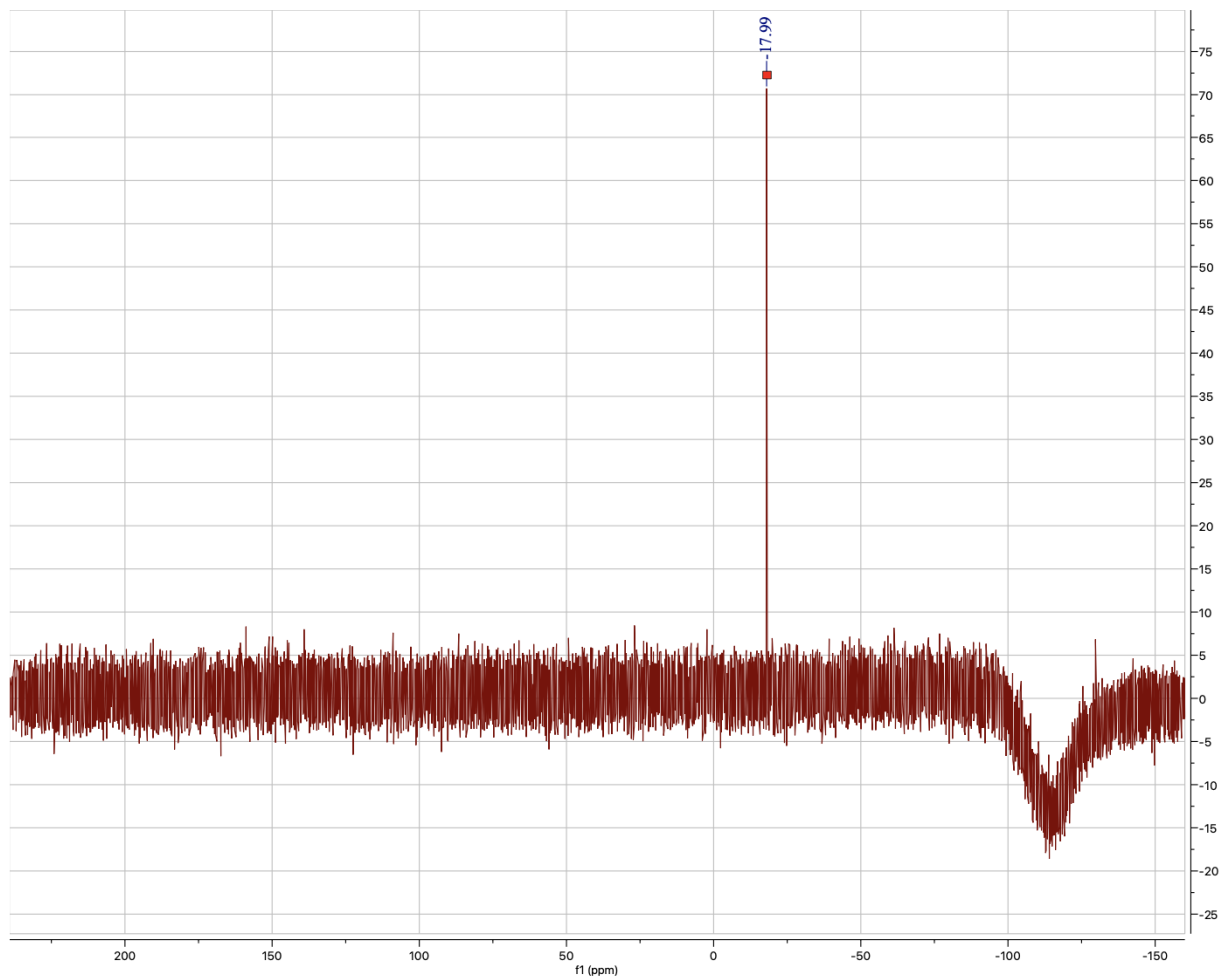

**Figure S.37.**  $^{29}\text{Si}\{^1\text{H}\}$  NMR spectrum of the reaction between  $\text{Ph}_3\text{SiH}$  and  $^t\text{BuNH}_2$  catalyzed by  $\text{MeMgBr}$  in benzene- $d_6$  after overnight heating at  $40\text{ }^\circ\text{C}$ .

### S2.19. $\text{Ph}_3\text{SiH}$ and $^t\text{BuNH}_2$

$\text{Ph}_3\text{SiH}$  ( $100\ \mu\text{L}$ ,  $3.36\ \text{M}$  in benzene- $d_6$ ,  $3.36 \times 10^{-1}\ \text{mmol}$ ),  $^t\text{BuNH}_2$  ( $67.0\ \mu\text{L}$ ,  $6.72 \times 10^{-1}\ \text{mmol}$ , 2.0 equiv.), and  $\text{MeMgBr}$  ( $14.7\ \mu\text{L}$ ,  $1.68 \times 10^{-2}\ \text{mmol}$ , 5.0 mol %) were reacted together in  $0.5\ \text{mL}$  of benzene- $d_6$  in the presence of  $\text{C}_6\text{Me}_6$  standard ( $50.0\ \mu\text{L}$ ,  $0.4\ \text{M}$  in benzene- $d_6$ ). Incomplete consumption of  $\text{Ph}_3\text{SiH}$  was observed after overnight heating to  $40\text{ }^\circ\text{C}$ , as determined by the presence of the  $\text{SiH}$  peak at  $\delta = 5.68$  in the  $^1\text{H}$  NMR spectrum. The appearance of a diagnostic quartet centered at  $\delta = 2.85$  in the  $^1\text{H}$  NMR spectrum indicates 63% conversion to  $\text{Ph}_3\text{Si}(\text{NH}^t\text{Bu})$  after overnight heating at  $40\text{ }^\circ\text{C}$ . Spectra were consistent with previous reports of this compound.<sup>2,8</sup>

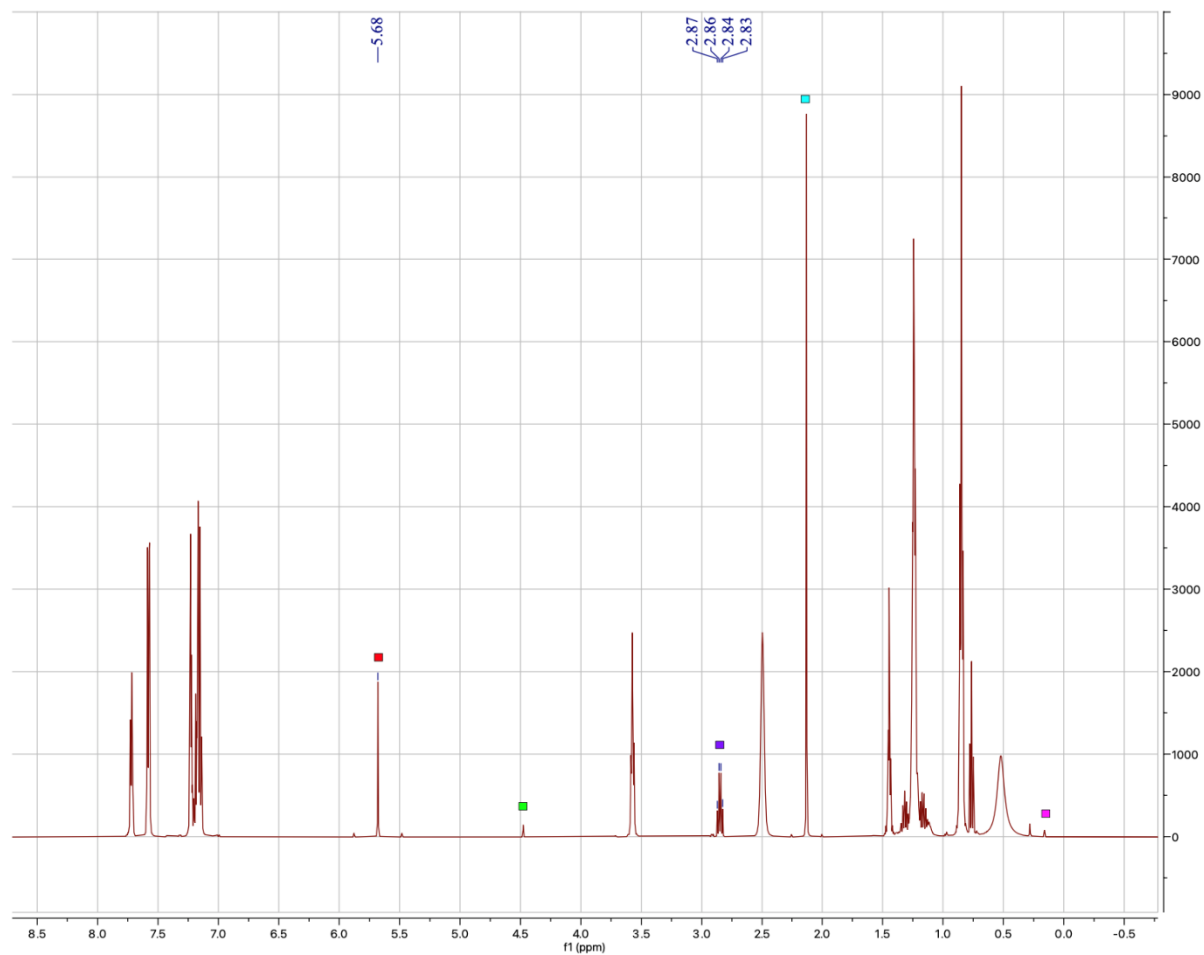

**Figure S.38.**  $^1\text{H}$  NMR spectrum of the reaction between  $\text{Ph}_3\text{SiH}$  and  $n\text{BuNH}_2$  catalyzed by  $\text{MeMgBr}$  in benzene- $d_6$  after overnight heating at  $40^\circ\text{C}$ .

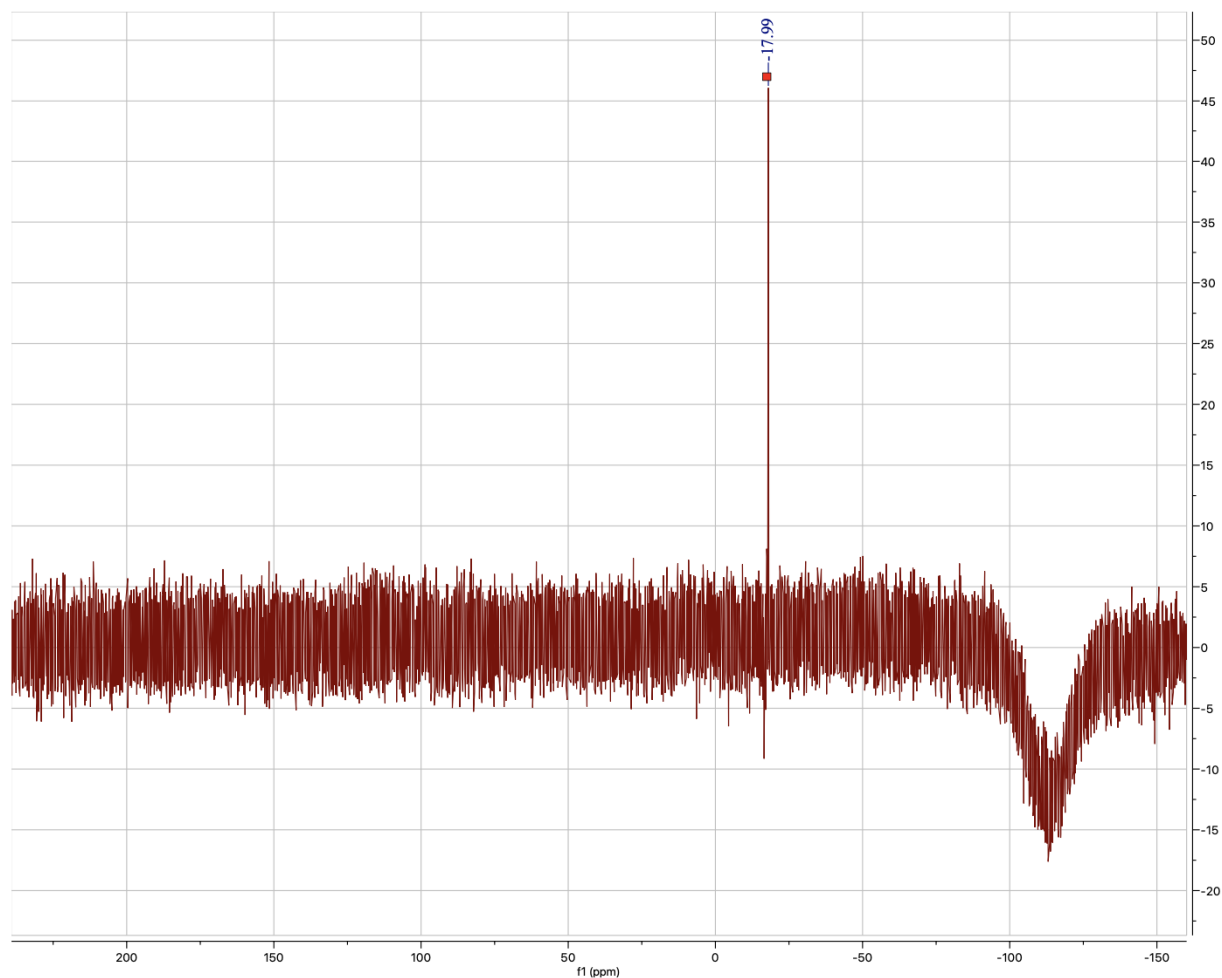

**Figure S.39.**  $^{29}\text{Si}\{^1\text{H}\}$  NMR spectrum of the reaction between  $\text{Ph}_3\text{SiH}$  and  $n\text{BuNH}_2$  catalyzed by  $\text{MeMgBr}$  in benzene- $d_6$  after overnight heating at  $40\text{ }^\circ\text{C}$ .

## S2.20. $\text{Ph}_3\text{SiH}$ and $\text{PyNH}$

$\text{Ph}_3\text{SiH}$  ( $100\text{ }\mu\text{L}$ ,  $3.36\text{ M}$  in benzene- $d_6$ ,  $3.36 \times 10^{-1}\text{ mmol}$ ),  $\text{PyNH}$  ( $56.0\text{ }\mu\text{L}$ ,  $6.72 \times 10^{-1}\text{ mmol}$ , 2.0 equiv.), and  $\text{MeMgBr}$  ( $14.7\text{ }\mu\text{L}$ ,  $1.68 \times 10^{-2}\text{ mmol}$ , 5.0 mol %) were reacted together in  $0.5\text{ mL}$  of benzene- $d_6$  in the presence of  $\text{C}_6\text{Me}_6$  standard ( $50.0\text{ }\mu\text{L}$ ,  $0.4\text{ M}$  in benzene- $d_6$ ). Incomplete consumption of  $\text{Ph}_3\text{SiH}$  was observed after overnight heating to  $40\text{ }^\circ\text{C}$ , as determined by the presence of the  $\text{SiH}$  peak at  $\delta = 5.68$  in the  $^1\text{H}$  NMR spectrum. The appearance of a diagnostic multiplet centered at  $\delta = 3.09$  in the  $^1\text{H}$  NMR spectrum indicates 51% conversion to  $\text{Ph}_3\text{Si}(\text{NPy})$  after overnight heating at  $40\text{ }^\circ\text{C}$ . Spectra were consistent with previous reports of this compound.<sup>2,9</sup>



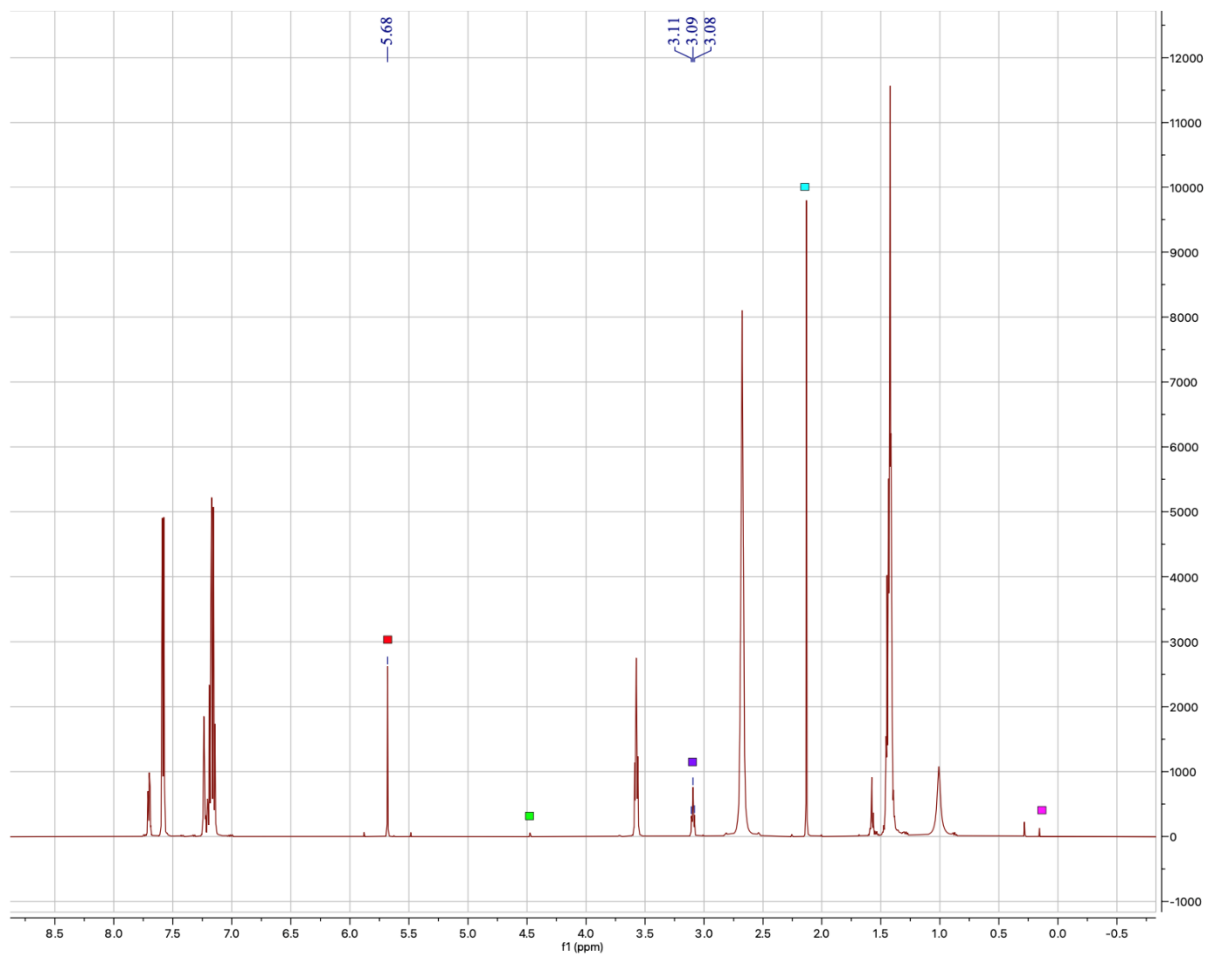

**Figure S.40.**  $^1\text{H}$  NMR spectrum of the reaction between  $\text{Ph}_3\text{SiH}$  and  $\text{PyNH}$  catalyzed by  $\text{MeMgBr}$  in benzene- $d_6$  after overnight heating at  $40\text{ }^\circ\text{C}$ .

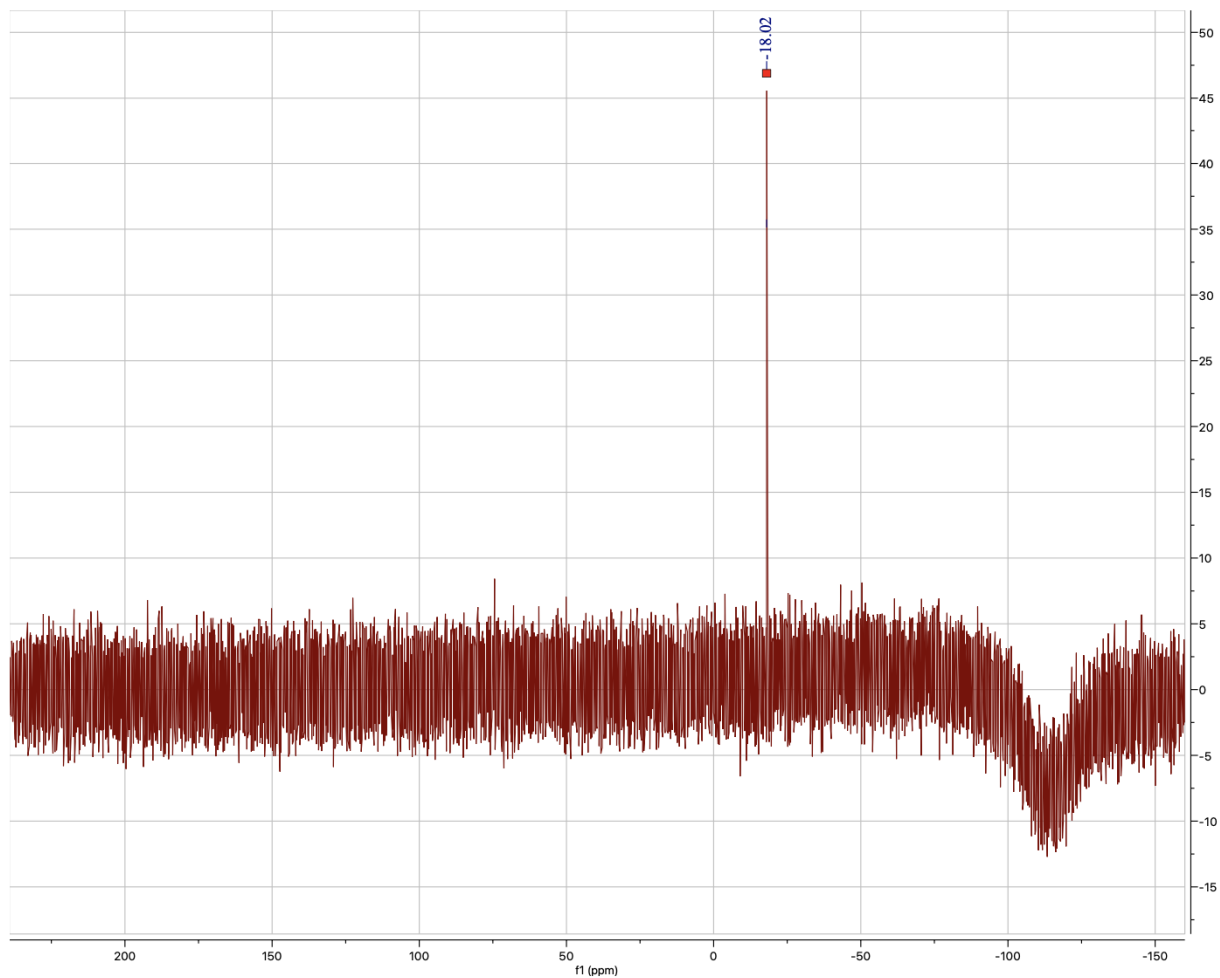

**Figure S.41.**  $^{29}\text{Si}\{^1\text{H}\}$  NMR spectrum of the reaction between  $\text{Ph}_3\text{SiH}$  and  $\text{PyNH}$  catalyzed by  $\text{MeMgBr}$  in benzene- $d_6$  after overnight heating at  $40^\circ\text{C}$ .

### S3. Mechanistic Investigations

#### S3.1. Stoichiometric PhSiH<sub>3</sub> and MeMgBr

PhSiH<sub>3</sub> (41.0 μL, 3.36 × 10<sup>-1</sup> mmol, 1.0 equiv.) and MeMgBr (247.1 μL, 3.36 × 10<sup>-1</sup> mmol, 1.0 equiv.) were reacted together in 0.5 mL of benzene-*d*<sub>6</sub> in the presence of C<sub>6</sub>Me<sub>6</sub> standard (50.0 μL, 0.4 M in benzene-*d*<sub>6</sub>). The appearance of a multiplet at δ = 4.43 in the <sup>1</sup>H NMR spectrum and a peak at δ = -36.16 in the <sup>29</sup>Si{<sup>1</sup>H} NMR spectrum is indicative of formation of PhMeSiH<sub>2</sub>.

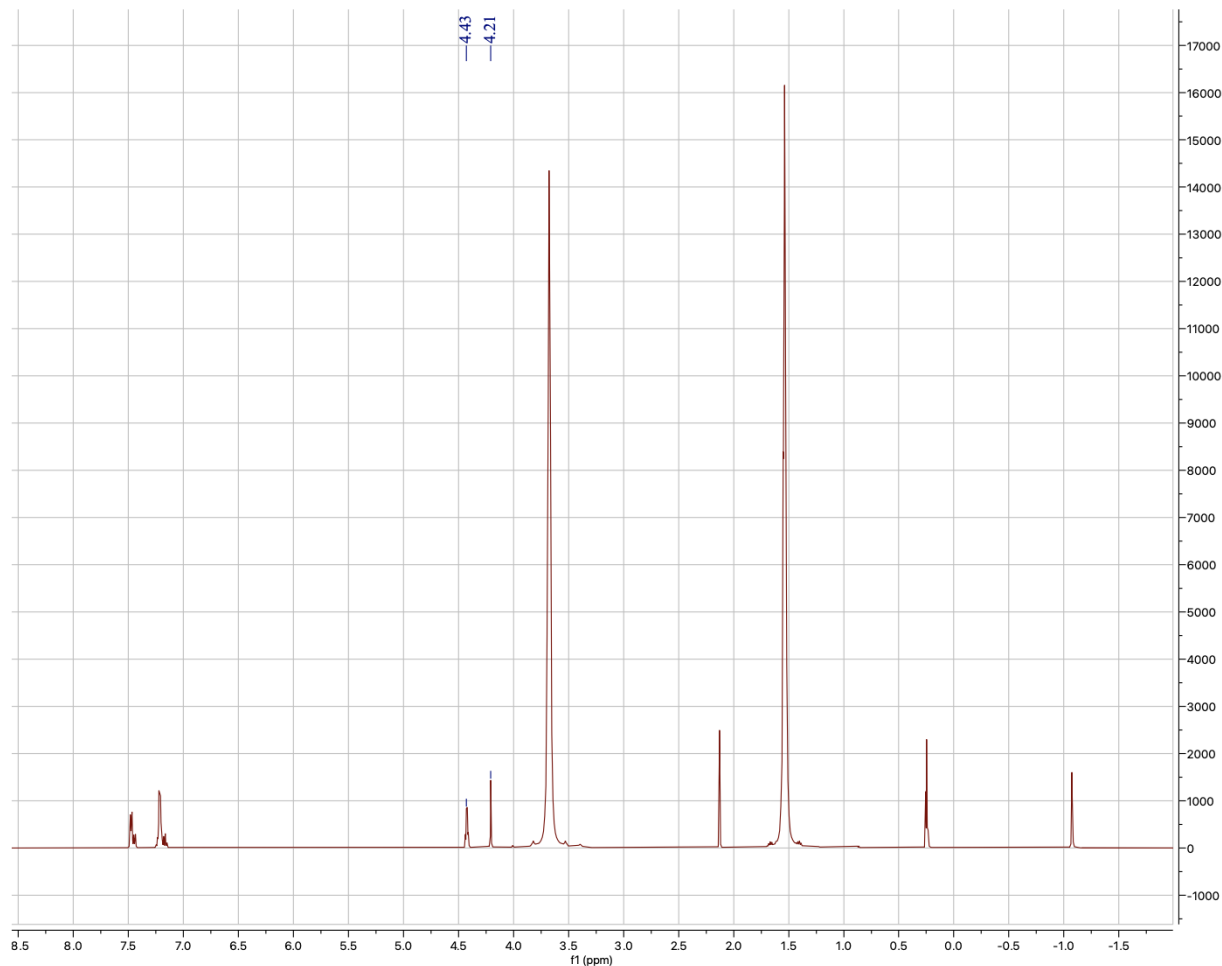

**Figure S.42.** <sup>1</sup>H NMR spectrum of the stoichiometric reaction between PhSiH<sub>3</sub> and MeMgBr in benzene-*d*<sub>6</sub>.

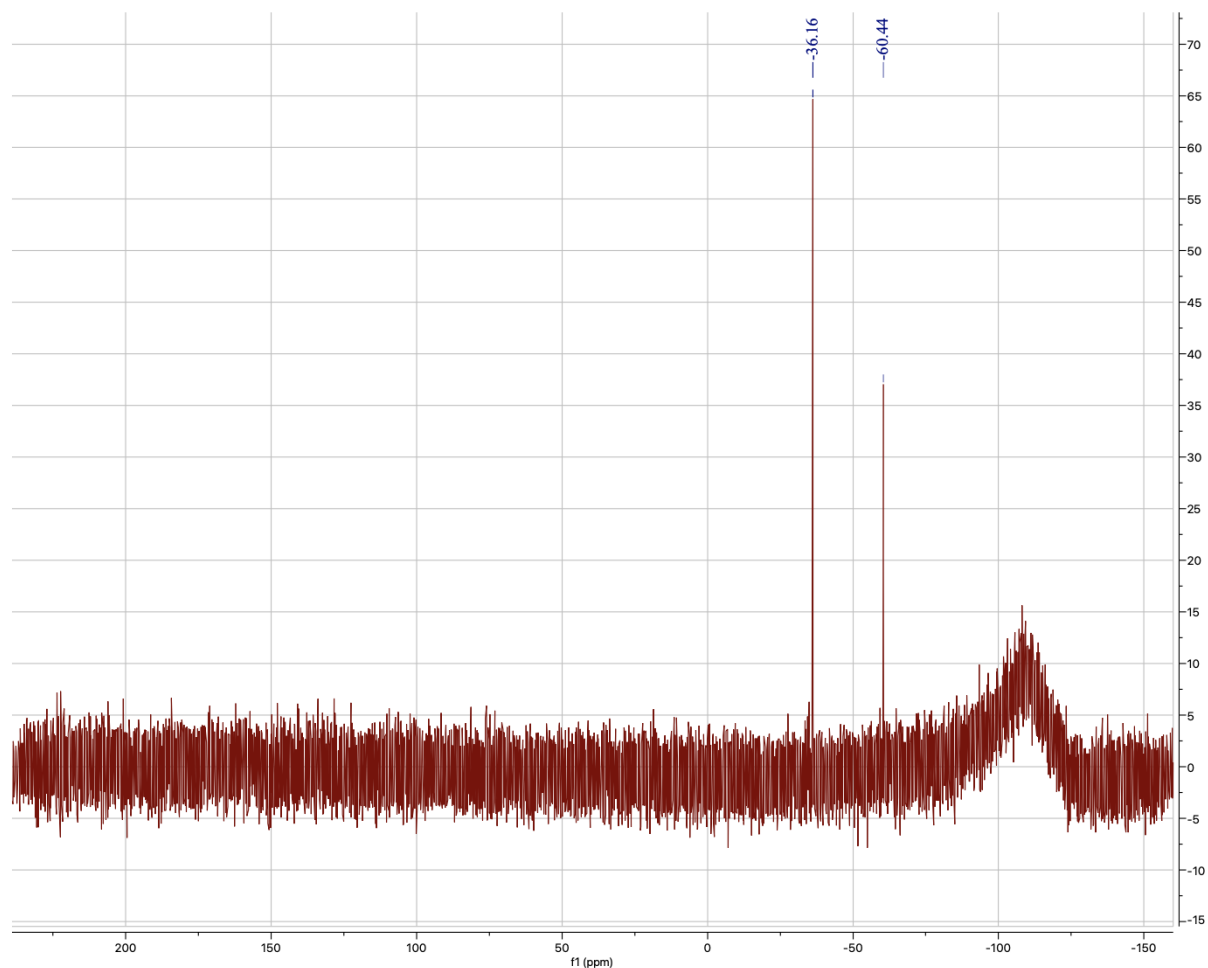

**Figure S.43.**  $^{29}\text{Si}\{^1\text{H}\}$  NMR spectrum of the stoichiometric reaction between  $\text{PhSiH}_3$  and  $\text{MeMgBr}$  in benzene- $d_6$ .

### S3.2. Stoichiometric $n\text{BuNH}_2$ and $\text{MeMgBr}$

$n\text{BuNH}_2$  ( $33.5 \mu\text{L}$ ,  $3.36 \times 10^{-1}$  mmol, 1.0 equiv.) and  $\text{MeMgBr}$  ( $247.1 \mu\text{L}$ ,  $3.36 \times 10^{-1}$  mmol, 1.0 equiv.) were reacted together in 0.5 mL of benzene- $d_6$  in the presence of  $\text{C}_6\text{Me}_6$  standard ( $50.0 \mu\text{L}$ , 0.4 M in benzene- $d_6$ ). The appearance of a peak at  $\delta = 0.16$  in the  $^1\text{H}$  NMR spectrum is indicative of formation of methane while the peak at  $\delta = -0.50$ , multiplet centered between  $\delta = 0.98$  and  $\delta = 0.99$ , and the peak at  $\delta = 2.97$  suggests formation of  $n\text{BuN(H)MgBr}$ .

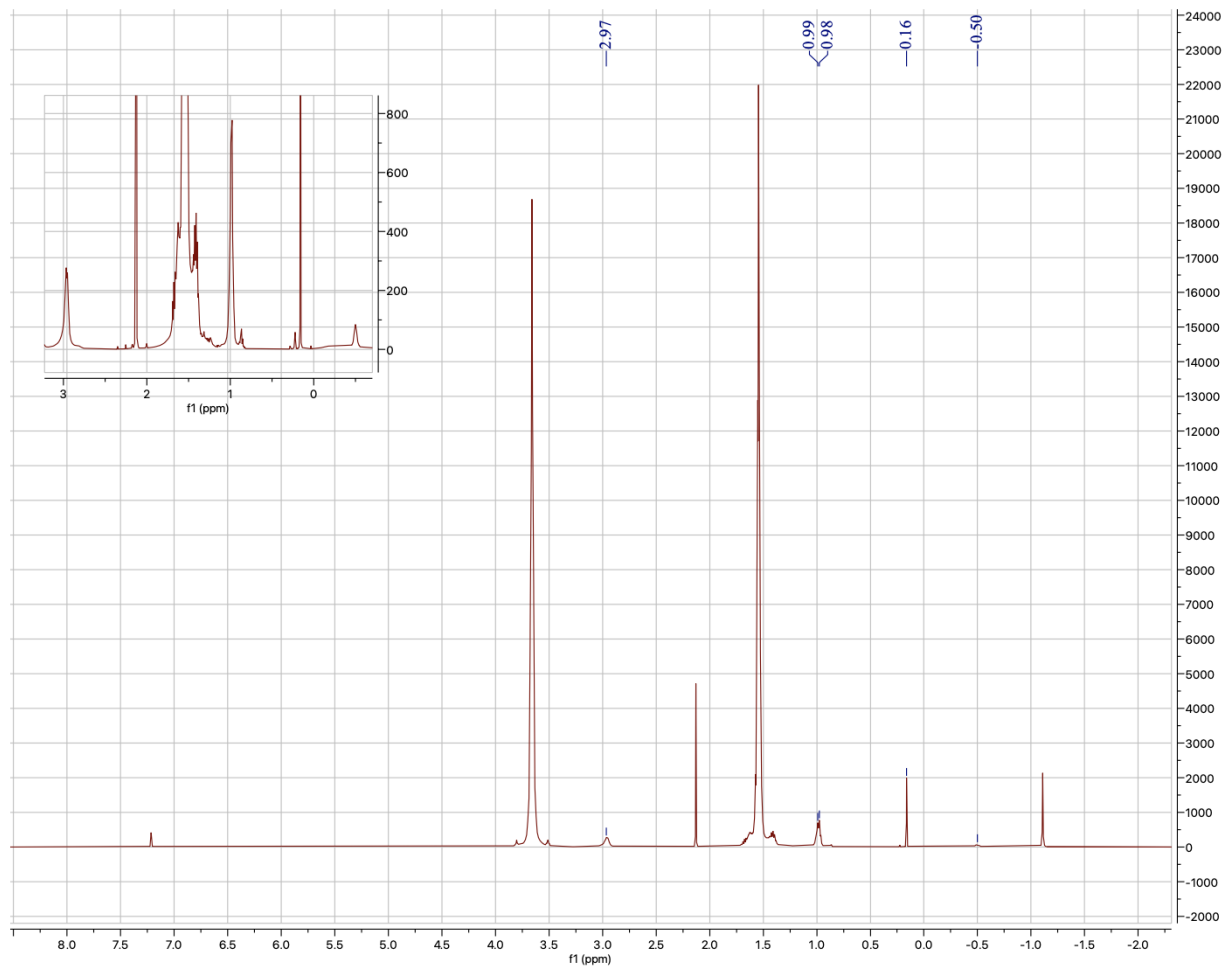

**Figure S.44.** <sup>1</sup>H NMR spectrum of the stoichiometric reaction between <sup>n</sup>BuNH<sub>2</sub> and MeMgBr in benzene-*d*<sub>6</sub>.

### S3.3. PhSiH<sub>3</sub> and <sup>n</sup>BuNH<sub>2</sub> with MesMgBr

PhSiH<sub>3</sub> (41.0 μL, 3.36 × 10<sup>-1</sup> mmol), <sup>n</sup>BuNH<sub>2</sub> (201.0 μL, 20.16 × 10<sup>-1</sup> mmol, 6.0 equiv.), and MesMgBr (18.7 μL, 1.68 × 10<sup>-2</sup> mmol, 5.0 mol %) were reacted together in 0.5 mL of benzene-*d*<sub>6</sub> in the presence of C<sub>6</sub>Me<sub>6</sub> standard (50.0 μL, 0.4 M in benzene-*d*<sub>6</sub>). Complete consumption of PhSiH<sub>3</sub> was observed after 1 h. The appearance of multiplet centered at δ = 2.87 in the <sup>1</sup>H NMR spectrum indicates 97% conversion to PhSi(NH<sup>n</sup>Bu)<sub>3</sub> after 1 h at ambient temperature.

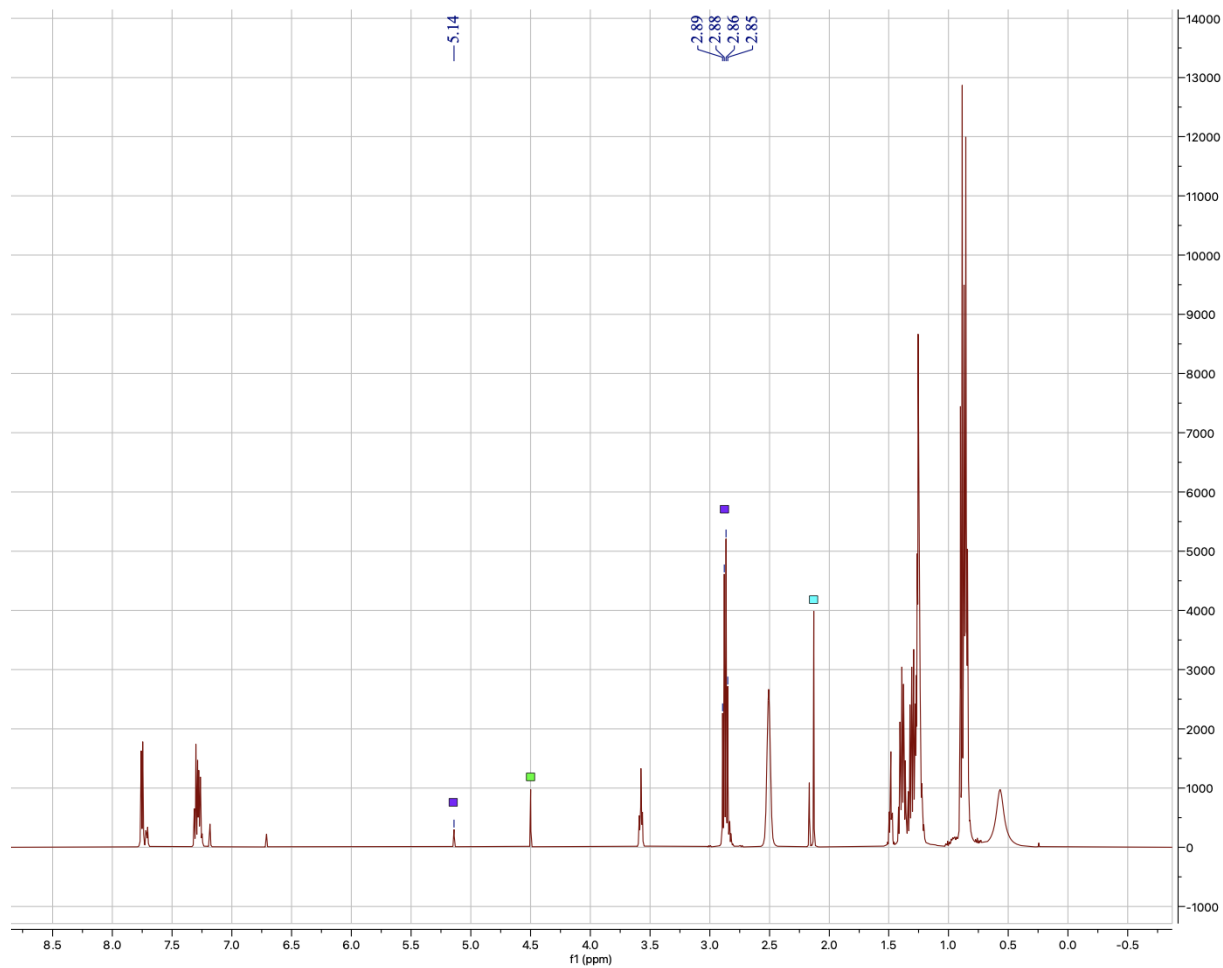

**Figure S.45.**  $^1\text{H}$  NMR spectrum of the reaction between  $\text{PhSiH}_3$  and  $n\text{BuNH}_2$  catalyzed by  $\text{MesMgBr}$  in  $\text{benzene-}d_6$  after 1 h.

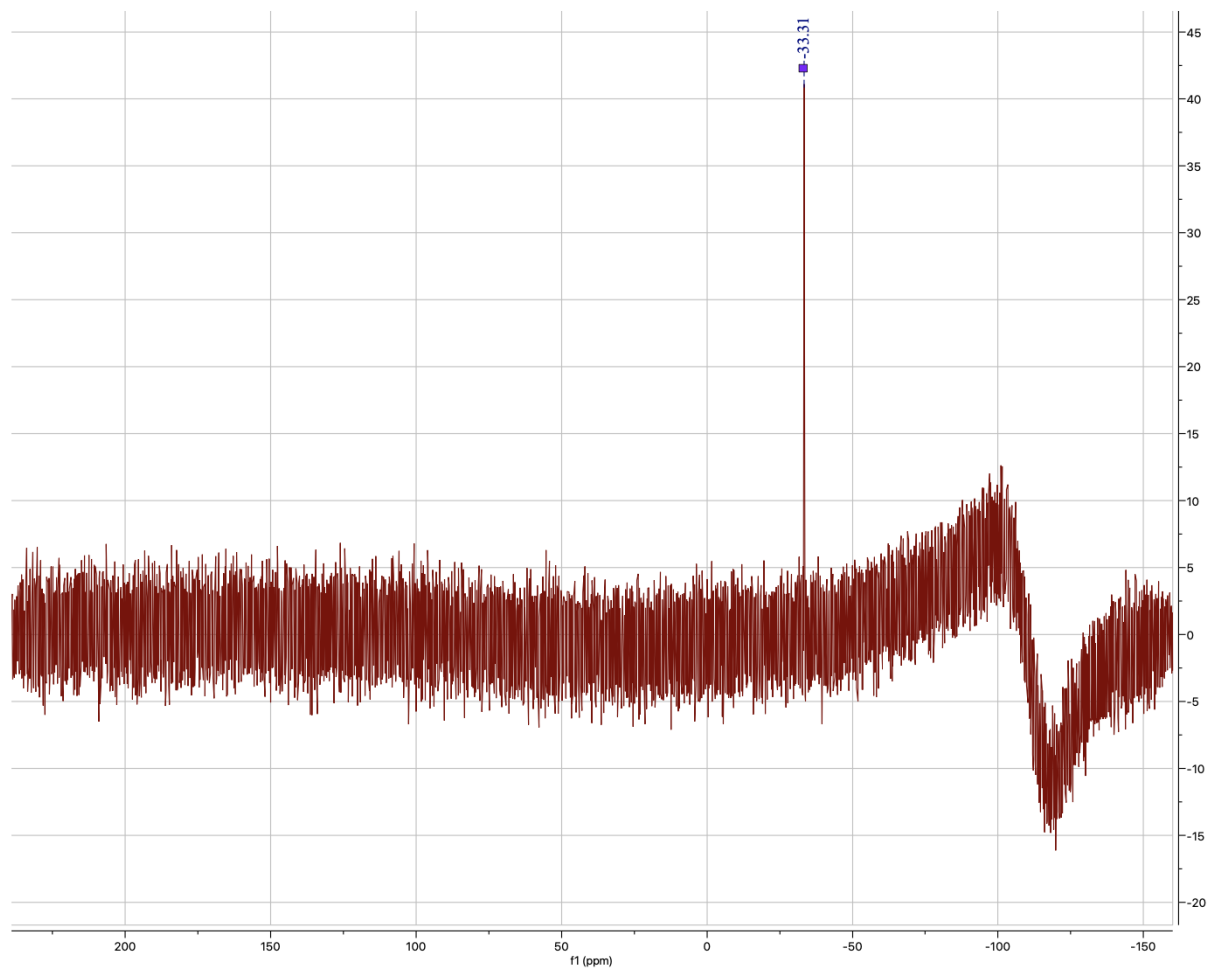

**Figure S.46.**  $^{29}\text{Si}\{^1\text{H}\}$  NMR spectrum of the reaction between  $\text{PhSiH}_3$  and  $n\text{BuNH}_2$  catalyzed by  $\text{MesMgBr}$  in benzene- $d_6$  after 1 h.

### S3.4. $\text{PhSiH}_3$ and $n\text{BuNH}_2$ with $\text{Me}_2\text{Mg}$

$\text{PhSiH}_3$  (41.0  $\mu\text{L}$ ,  $3.36 \times 10^{-1}$  mmol),  $n\text{BuNH}_2$  (201.0  $\mu\text{L}$ ,  $20.16 \times 10^{-1}$  mmol, 6.0 equiv.), and  $\text{Me}_2\text{Mg}$  (32.0  $\mu\text{L}$ ,  $1.68 \times 10^{-2}$  mmol, 5.0 mol %) were reacted together in 0.5 mL of benzene- $d_6$  in the presence of  $\text{C}_6\text{Me}_6$  standard (50.0  $\mu\text{L}$ , 0.4 M in benzene- $d_6$ ). Complete consumption of  $\text{PhSiH}_3$  was observed after 1 h. The appearance of multiplet centered at  $\delta = 2.85$  in the  $^1\text{H}$  NMR spectrum indicates 91% conversion to  $\text{PhSi}(\text{NH}n\text{Bu})_3$  after 1 h at ambient temperature.

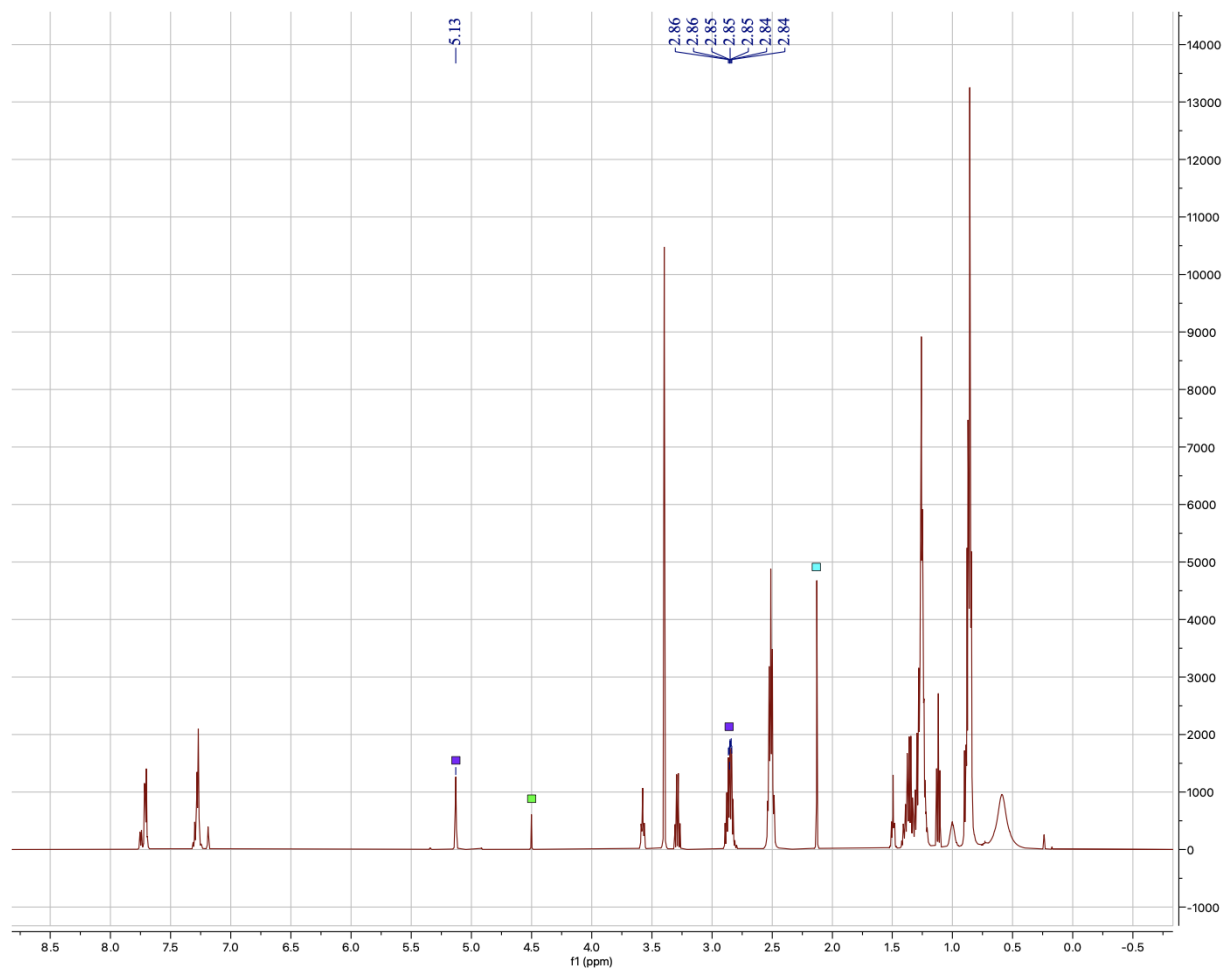

**Figure S.47.**  $^1\text{H}$  NMR spectrum of the reaction between  $\text{PhSiH}_3$  and  $n\text{BuNH}_2$  catalyzed by  $\text{Me}_2\text{Mg}$  in benzene- $d_6$  after 1 h.



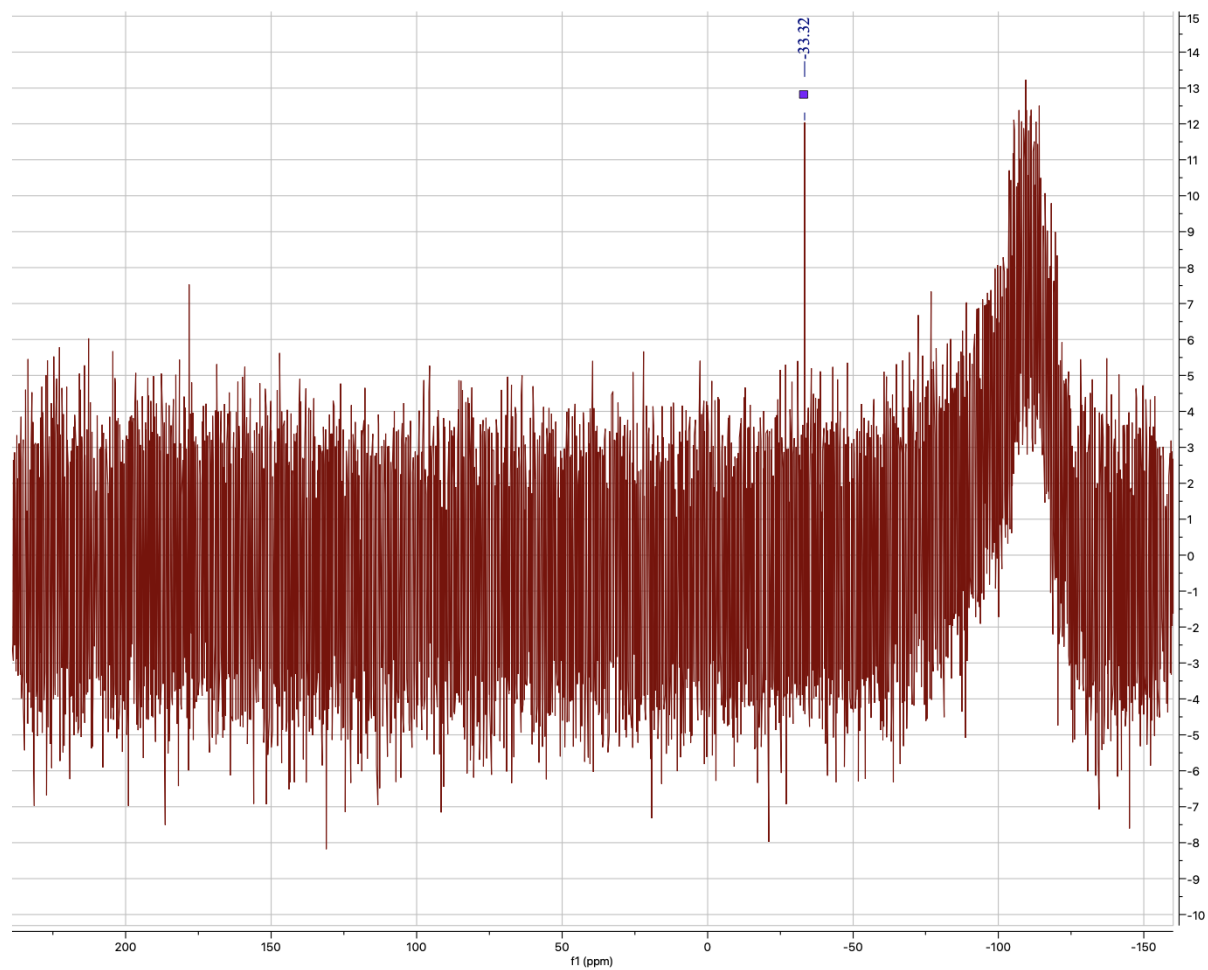

**Figure S.48.**  $^{29}\text{Si}\{^1\text{H}\}$  NMR spectrum of the reaction between  $\text{PhSiH}_3$  and  $n\text{BuNH}_2$  catalyzed by  $\text{Me}_2\text{Mg}$  in benzene- $d_6$  after 1 h.

#### S4. References

1. D. Tobia, J. Baranski and B. Rickborn, *The Journal of Organic Chemistry*, 1989, **54**, 4253-4256.
2. M. B. Reuter, C. E. Bushey, D. R. Javier-Jiménez and R. Waterman, *Dalton Transactions*, 2023, **52**, 13497-13506.
3. J. X. Wang, A. K. Dash, J. C. Berthet, M. Ephritikhine and M. S. Eisen, *Journal of Organometallic Chemistry*, 2000, **610**, 49-57.
4. W. Xie, H. Hu and C. Cui, *Angewandte Chemie International Edition*, 2012, **51**, 11141-11144.
5. X. Zhang, S. Zhou, X. Fang, L. Zhang, G. Tao, Y. Wei, X. Zhu, P. Cui and S. Wang, *Inorganic Chemistry*, 2020, **59**, 9683-9692.
6. M. P. Cibuzar and R. Waterman, *Organometallics*, 2018, **37**, 4395-4401.
7. J. F. Dunne, S. R. Neal, J. Engelkemier, A. Ellern and A. D. Sadow, *Journal of the American Chemical Society*, 2011, **133**, 16782-16785.
8. M. Xu, B. Kooij, T. Wang, J. H. Lin, Z.-W. Qu, S. Grimme and D. W. Stephan, *Angewandte Chemie International Edition*, 2021, **60**, 16965-16969.
9. Y. A. Rina and J. A. R. Schmidt, *Organometallics*, 2022, **41**, 2974-2984.
